# Supplementary material for: Synthesis and evaluation of (S)-5′-C-aminopropyl and (S)-5′-C-aminopropyl-2′-arabinofluoro modified DNA oligomers for novel RNase H-dependent antisense oligonucleotides
Source: Royal Society of Chemistry journal article supplement (doi:10.1039/d0ra08468a), 2020-01-01

## Supporting Information

### **Synthesis and Evaluation of (*S*)-5'-C-Aminopropyl and (*S*)-5'-C-Aminopropyl-2'-arabino-fluoro Modified DNA Oligomers for Novel RNase H-dependent Antisense Oligonucleotides**

**Yujun Zhou<sup>a</sup>, Ryohei Kajino<sup>a</sup>, Seiichiro Ishii<sup>e</sup>, Kenji Yamagishi<sup>e</sup> and Yoshihito Ueno<sup>a, b, c, d</sup>**

<sup>a</sup>Graduate School of Natural Science and Technology, <sup>b</sup>Faculty of Applied Biological Sciences, <sup>c</sup>United Graduate School of Agricultural Science, and <sup>d</sup>Center for Highly Advanced Integration of Nano and Life Sciences (G-CHAIN), Gifu University, 1-1 Yanagido, Gifu, 501-1193, Japan.

<sup>e</sup>Department of Chemical Biology and Applied Chemistry, College of Engineering, Nihon University, 1 Nakagawara, Tokusada, Tamuramachi, Koriyama, Fukushima 963-8642, Japan

## Contents

- Figure S1. Molecular Modeling: the reference structure atom types and calculated RESP charges for each nucleoside.
- Figure S2. Molecular Modeling: the changes (up) and the distributions (down) of time-dependent RMSD (Å) of each nucleoside.
- Figure S3. Molecular Modeling: pseudorotational phase angle (P).
- Figure S4. Thermal Stability of Duplexes: the UV melting profiles of duplex **1-3**.
- Figure S5. Thermal Stability of Duplexes: the graphical data of  $1/T_m$  vs  $\ln(C_T/4)$  plots.
- Figure S6. Thermal Stability of Duplexes: the UV melting profiles of duplex **4-15**.
- Figure S7. Thermal Stability of Duplexes: the UV melting profiles of duplex **19-22**.
- Table S1. Thermal Stability of Duplexes: the sequences and  $T_m$  values of duplex **4-15**.
- Table S2. Thermal Stability of Duplexes: the sequences and  $T_m$  values of duplex **1, 19-22**.
- Figure S8. RNase H-mediated cleavage assays: the sequences of duplex **23-26** and the images of PAGE analysis.

$^1\text{H}$  and  $^{13}\text{C}$  NMR spectra of compounds **2-7, 13-18, 20-21**,  $^{19}\text{F}$  NMR spectra of compounds **13-21**,  $^{31}\text{P}$  NMR spectra of compounds **8, 19**, and  $^1\text{H}$  NOESY spectra of compounds **20-21**.

Reverse-phase HPLC spectra and MALDI-TOF/MS spectra of DNAs **1-3, 5-13** and RNAs **1, 6**.

a.

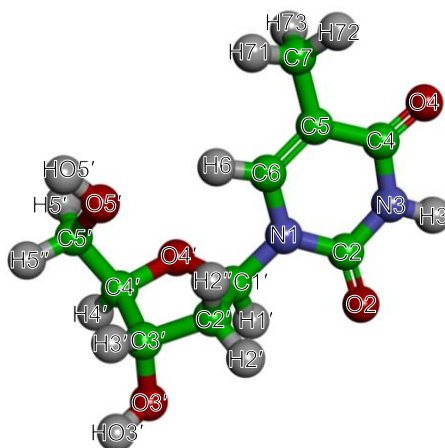

| Atom name | Atom type | RESP charge | Atom name | Atom type | RESP charge |
|-----------|-----------|-------------|-----------|-----------|-------------|
| O5'       | oh        | -0.642377   | H1'       | h2        | 0.183207    |
| HO5'      | ho        | 0.445969    | N1        | n         | 0.004881    |
| C5'       | c3        | -0.026110   | C6        | cc        | -0.258929   |
| H5''      | h1        | 0.085899    | H6        | h4        | 0.277171    |
| H5'       | h1        | 0.085899    | C5        | cd        | -0.015884   |
| C4'       | c3        | 0.167490    | C7        | c3        | -0.226761   |
| C3'       | c3        | 0.131625    | H73       | hc        | 0.078192    |
| C2'       | c3        | -0.085285   | H72       | hc        | 0.078192    |
| H2''      | hc        | 0.056570    | H71       | hc        | 0.078192    |
| H2'       | hc        | 0.056570    | C4        | c         | 0.604130    |
| H3'       | h1        | 0.089949    | O4        | o         | -0.561408   |
| O3'       | oh        | -0.670856   | N3        | n         | -0.505706   |
| HO3'      | ho        | 0.440276    | H3        | hn        | 0.345687    |
| H4'       | h1        | 0.110996    | C2        | c         | 0.606967    |
| O4'       | os        | -0.394698   | O2        | o         | -0.597377   |
| C1'       | c3        | 0.057527    |           |           |             |

b.

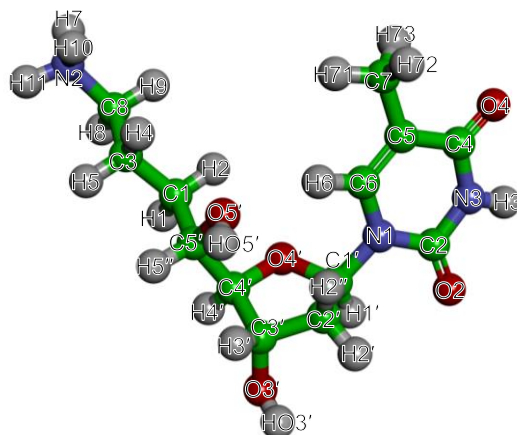

| Atom name | Atom type | RESP charge | Atom name | Atom type | RESP charge |
|-----------|-----------|-------------|-----------|-----------|-------------|
| N2        | n4        | -0.262310   | H2''      | hc        | 0.030480    |
| H7        | hn        | 0.296620    | H2'       | hc        | 0.030480    |
| H10       | hn        | 0.296620    | H3'       | h1        | 0.055066    |
| H11       | hn        | 0.296620    | H4'       | h1        | 0.141936    |
| C8        | c3        | 0.056368    | O4'       | os        | -0.396941   |
| H8        | hx        | 0.087808    | C1'       | c3        | 0.108014    |
| H9        | hx        | 0.087808    | H1'       | h2        | 0.175389    |
| C3        | c3        | 0.031312    | N1        | n         | -0.016848   |
| H4        | hc        | 0.035624    | C6        | cc        | -0.231780   |
| H5        | hc        | 0.035624    | H6        | h4        | 0.266459    |
| C1        | c3        | -0.116672   | C5        | cd        | -0.020402   |
| H1        | hc        | 0.070456    | C7        | c3        | -0.253122   |
| H2        | hc        | 0.070456    | H73       | hc        | 0.088682    |
| C5'       | c3        | 0.027808    | H72       | hc        | 0.088682    |
| O5'       | oh        | -0.628030   | H71       | hc        | 0.088682    |
| HO5'      | ho        | 0.437222    | C4        | c         | 0.585963    |
| H5''      | h1        | 0.083525    | O4        | o         | -0.537039   |
| C4'       | c3        | 0.098860    | N3        | n         | -0.453277   |
| C3'       | c3        | 0.174422    | H3        | hn        | 0.344928    |
| O3'       | oh        | -0.681593   | C2        | c         | 0.542066    |
| HO3'      | ho        | 0.455432    | O2        | o         | -0.562935   |
| C2'       | c3        | -0.028466   |           |           |             |

c.

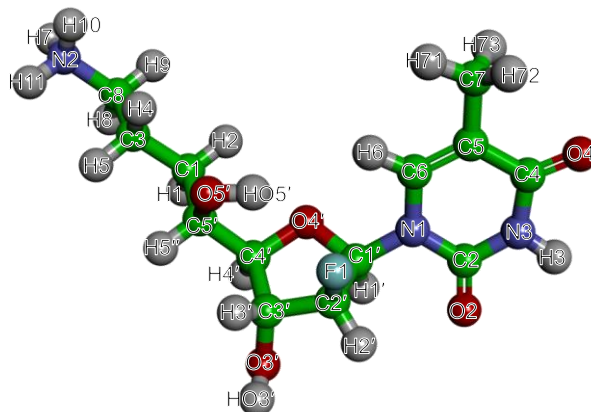

| Atom name | Atom type | RESP charge | Atom name | Atom type | RESP charge |
|-----------|-----------|-------------|-----------|-----------|-------------|
| N2        | n4        | -0.320336   | F1        | f         | -0.225659   |
| H11       | hn        | 0.312967    | H2'       | h1        | 0.146457    |
| H10       | hn        | 0.312967    | H3'       | h1        | 0.114231    |
| H7        | hn        | 0.312967    | H4'       | h1        | 0.164414    |
| C8        | c3        | 0.047498    | O4'       | os        | -0.349118   |
| H9        | hx        | 0.093169    | C1'       | c3        | 0.041278    |
| H8        | hx        | 0.093169    | H1'       | h2        | 0.183224    |
| C3        | c3        | 0.002191    | N1        | n         | 0.018101    |
| H5        | hc        | 0.049590    | C6        | cc        | -0.281532   |
| H4        | hc        | 0.049590    | H6        | h4        | 0.266824    |
| C1        | c3        | -0.053607   | C5        | cd        | 0.004856    |
| H2        | hc        | 0.048251    | C7        | c3        | -0.252306   |
| H1        | hc        | 0.048251    | H73       | hc        | 0.088667    |
| C5'       | c3        | 0.030046    | H72       | hc        | 0.088667    |
| O5'       | oh        | -0.622083   | H71       | hc        | 0.088667    |
| HO5'      | ho        | 0.429055    | C4        | c         | 0.626134    |
| H5''      | h1        | 0.094626    | O4        | o         | -0.542153   |
| C4'       | c3        | 0.057593    | N3        | n         | -0.537816   |
| C3'       | c3        | 0.090972    | H3        | hn        | 0.365852    |
| O3'       | oh        | -0.649012   | C2        | c         | 0.619609    |
| HO3'      | ho        | 0.454943    | O2        | o         | -0.586622   |
| C2'       | c3        | 0.075419    |           |           |             |

**Figure S1. Molecular Modeling: the reference structure, atom types and calculated RESP charges for each nucleoside.** The reference structures were obtained from an energy minimization calculation. (a) Thymidine. (b) (*S*)-5'-*C*-aminopropyl-thymidine (**A3**). (c) (*S*)-5'-*C*-aminopropyl-2'- $\beta$ -fluoro-thymidine (**A4**).

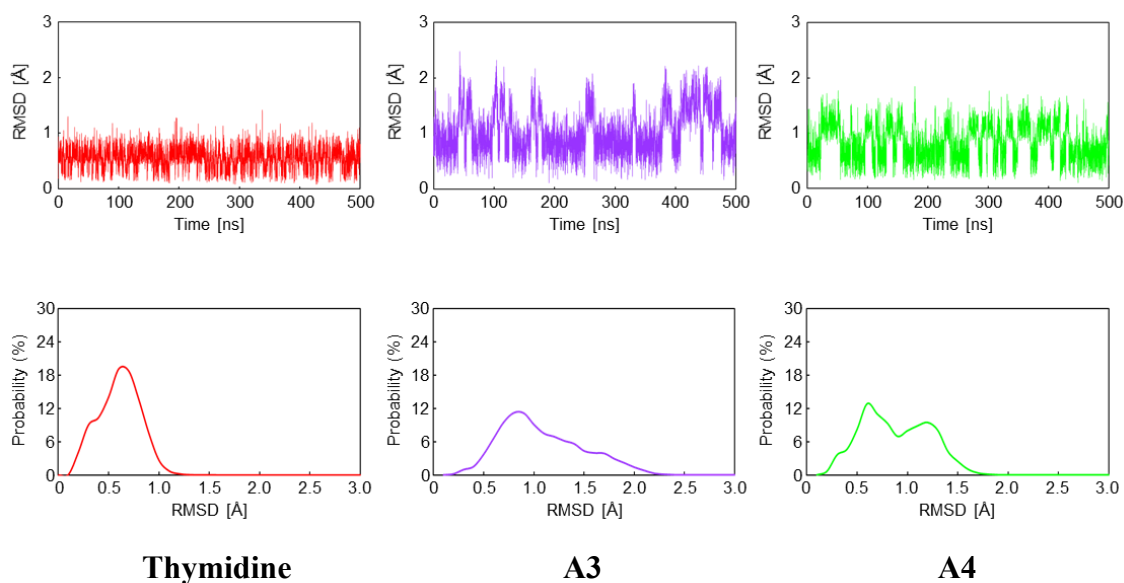

**Figure S2. Molecular Modeling: the changes (up) and the distributions (down) of time-dependent RMSD (Å) of each nucleoside**

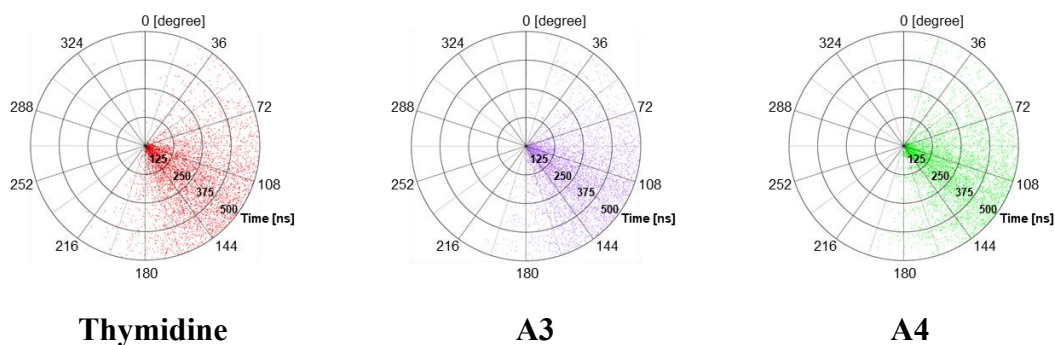

**Figure S3. Molecular Modeling: pseudorotational phase angle (*P*).**

The radial axes are the times with the origin as 0 ns and increasing outward to 500 ns.

The angular axes represent the torsion angles with ranges from 0 to  $2\pi$  in clockwise direction.

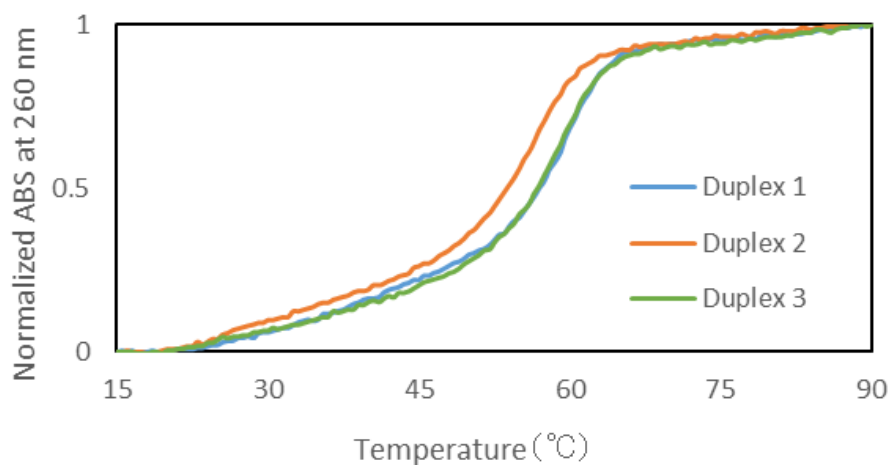

**Figure S4. Thermal Stability of Duplexes: the UV melting profiles of duplex 1-3.**

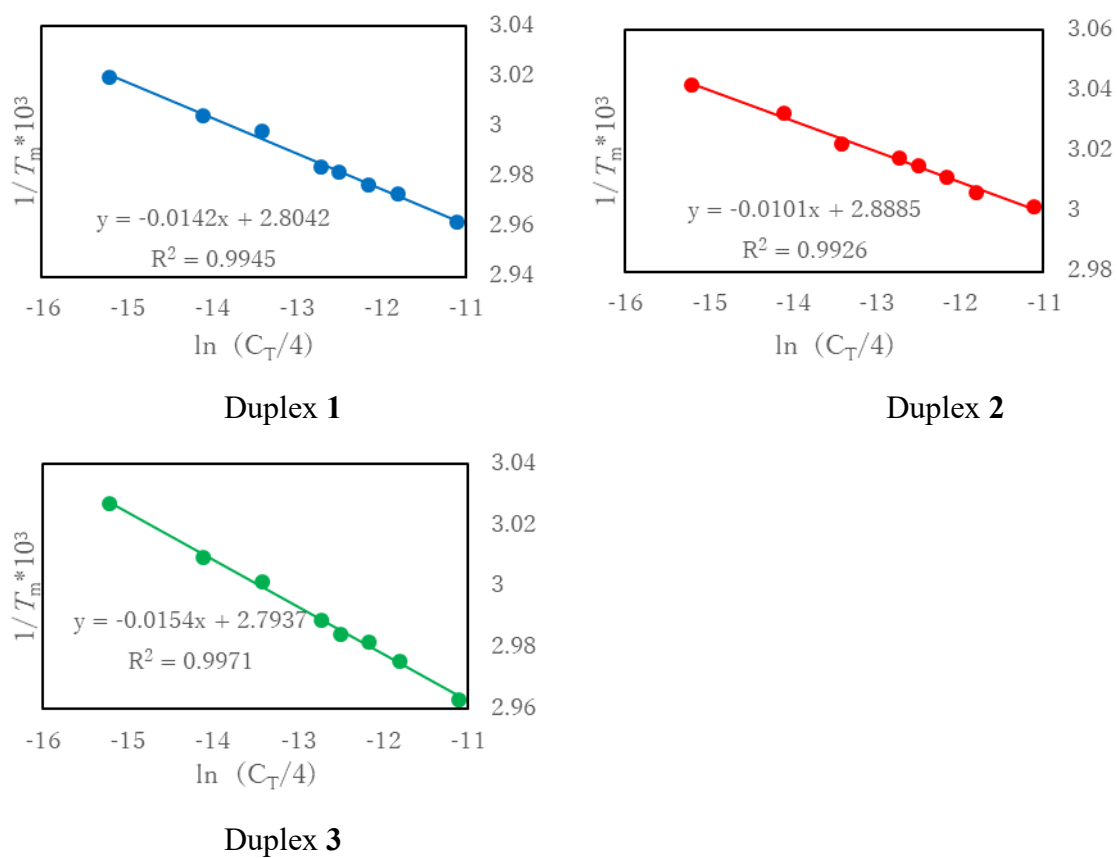

**Figure S5. Thermal Stability of Duplexes: the graphical data of  $1/T_m$  vs  $\ln(C_T/4)$**



plots

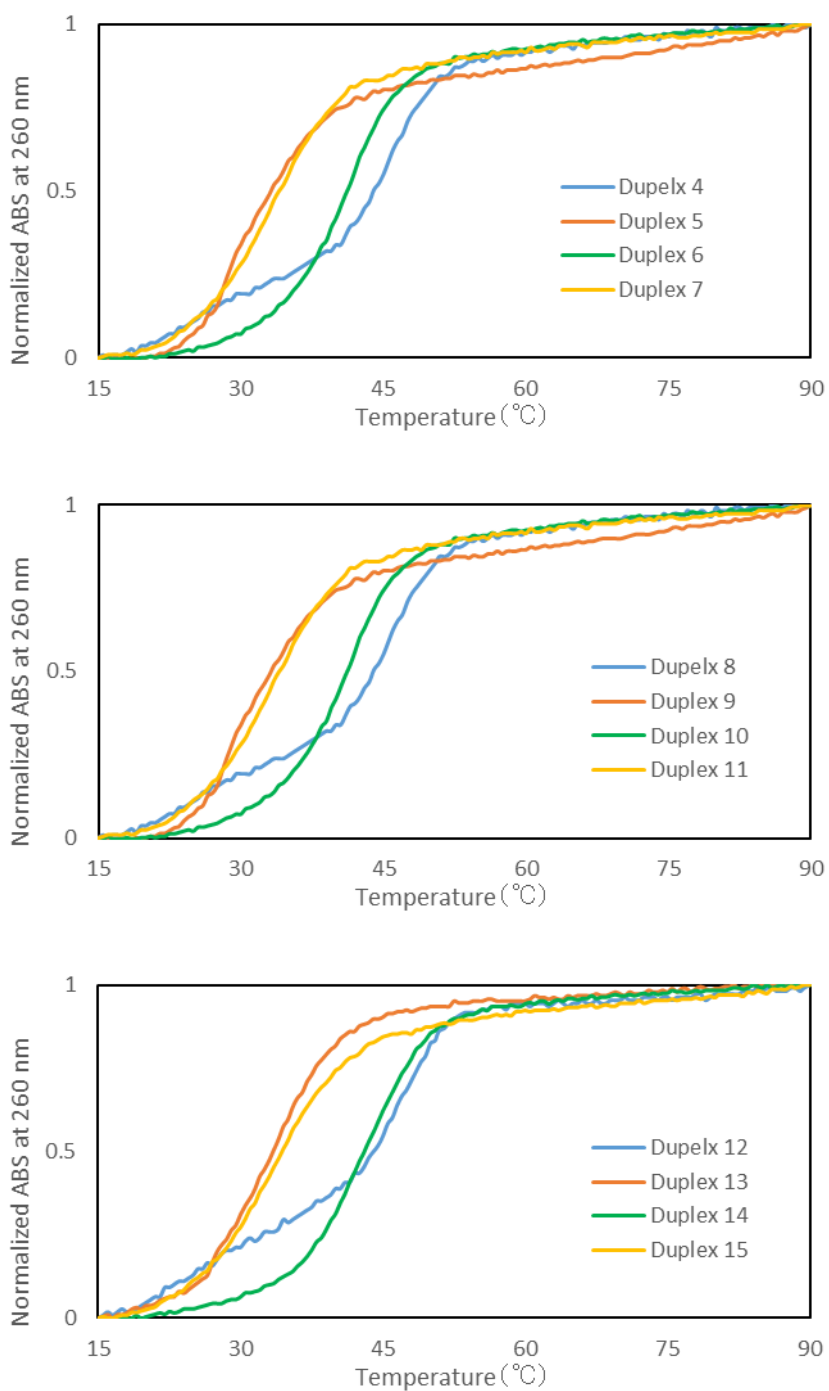

Figure S6. Thermal Stability of Duplexes: the UV melting profiles of duplex 4-15

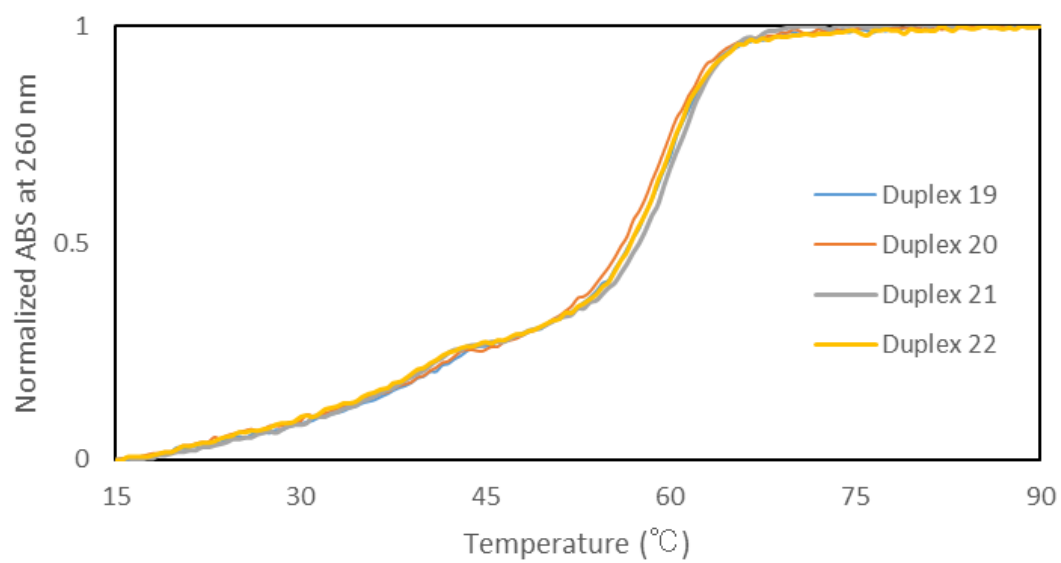

**Figure S7. Thermal Stability of Duplexes: the UV melting profiles of duplex 19-22.**

**Table S1. Thermal Stability of Duplexes: the sequences and  $T_m$  values of duplex 4-15.**

| Abbreviation of DNA/RNA duplex | Abbreviation of DNA or RNA | Sequence <sup>a</sup>                 | $T_m$ (°C) <sup>b</sup> | $\Delta T_m$ (°C) <sup>c</sup> |
|--------------------------------|----------------------------|---------------------------------------|-------------------------|--------------------------------|
| Duplex 4                       | DNA 4                      | 5' - d(GGCTATA <u>A</u> ATGTCCG) - 3' | 47.4                    | —                              |
|                                | RNA 2                      | 5'- r(CGACAUU <u>A</u> UAGCC) -3'     |                         |                                |
| Duplex 5                       | DNA 4                      | 5' - d(GGCTATAATGTCCG) - 3'           | 35.9                    | -11.5                          |
|                                | RNA 3                      | 5'- r(CGACAUU <u>U</u> UAGCC) -3'     |                         |                                |
| Duplex 6                       | DNA 4                      | 5' - d(GGCTATAATGTCCG) - 3'           | 42.1                    | -5.3                           |
|                                | RNA 4                      | 5'- r(CGACAUU <u>G</u> UAGCC) -3'     |                         |                                |
| Duplex 7                       | DNA 4                      | 5' - d(GGCTATAATGTCCG) - 3'           | 33.6                    | -13.8                          |
|                                | RNA 5                      | 5'- r(CGACAUU <u>C</u> UAGCC) -3'     |                         |                                |
| Duplex 8                       | DNA 5                      | 5' - d(GGCTAT <u>A</u> ATGTCCG) - 3'  | 47.1                    | —                              |
|                                | RNA 2                      | 5'- r(CGACAUU <u>A</u> UAGCC) -3'     |                         |                                |
| Duplex 9                       | DNA 5                      | 5' - d(GGCTAT <u>A</u> ATGTCCG) - 3'  | 31.3                    | -15.8                          |
|                                | RNA 3                      | 5'- r(CGACAUU <u>U</u> UAGCC) -3'     |                         |                                |
| Duplex 10                      | DNA 5                      | 5' - d(GGCTAT <u>A</u> ATGTCCG) - 3'  | 41.1                    | -6.0                           |
|                                | RNA 4                      | 5'- r(CGACAUU <u>G</u> UAGCC) -3'     |                         |                                |
| Duplex 11                      | DNA 5                      | 5' - d(GGCTAT <u>A</u> ATGTCCG) - 3'  | 32.4                    | -14.7                          |
|                                | RNA 5                      | 5'- r(CGACAUU <u>C</u> UAGCC) -3'     |                         |                                |
| Duplex 12                      | DNA 6                      | 5' - d(GGCTAT <u>A</u> ATGTCCG) - 3'  | 47.3                    | —                              |
|                                | RNA 2                      | 5'- r(CGACAUU <u>A</u> UAGCC) -3'     |                         |                                |
| Duplex 13                      | DNA 6                      | 5' - d(GGCTAT <u>A</u> ATGTCCG) - 3'  | 34.0                    | -13.3                          |
|                                | RNA 3                      | 5'- r(CGACAUU <u>U</u> UAGCC) -3'     |                         |                                |
| Duplex 14                      | DNA 6                      | 5' - d(GGCTAT <u>A</u> ATGTCCG) - 3'  | 43.3                    | -4.0                           |
|                                | RNA 4                      | 5'- r(CGACAUU <u>G</u> UAGCC) -3'     |                         |                                |
| Duplex 15                      | DNA 6                      | 5' - d(GGCTAT <u>A</u> ATGTCCG) - 3'  | 32.7                    | -14.6                          |
|                                | RNA 5                      | 5'- r(CGACAUU <u>C</u> UAGCC) -3'     |                         |                                |

<sup>a</sup>Underlined letters denote mismatched base pairs. T(red) and T(green) denote (S)-5'-C-Aminopropyl-thymidine (**A3**) and (S)-5'-C-Aminopropyl-2'-β-fluoro-thymidine (**A4**), respectively. <sup>b</sup>The  $T_m$  value were

measured in 10 mM sodium phosphate buffer (pH 7.0) containing 100 mM NaCl. The concentrations the duplexes were 3  $\mu$ M. <sup>c</sup> $\Delta T_m$  represents [ $T_m$  (duplex fully matched)-  $T_m$  (duplex mismatched)].

**Table S2. Thermal Stability of Duplexes: the sequences and  $T_m$  values of duplex 1, 16-19.**

| Abbreviation of DNA/RNA duplex | Abbreviation of DNA or RNA | Sequence <sup>a</sup>       | $T_m$ ( $^{\circ}$ C) <sup>b</sup> | $\Delta T_m$ ( $^{\circ}$ C) <sup>c</sup> |
|--------------------------------|----------------------------|-----------------------------|------------------------------------|-------------------------------------------|
| Duplex 1                       | DNA 1                      | 5'- d(TCTTTCTCTTTCCCTT) -3' | 60.0                               | -                                         |
|                                | RNA 1                      | 5'- r(AAGGGAAGAGAAAGA) -3'  |                                    |                                           |
| Duplex 19                      | DNA 10                     | 5'- d(TCTTTCTCTTTCCCTT) -3' | 60.1                               | +0.1                                      |
|                                | RNA 1                      | 5'- r(AAGGGAAGAGAAAGA) -3'  |                                    |                                           |
| Duplex 20                      | DNA 11                     | 5'- d(TCTTTCTCTTTCCCTT) -3' | 59.1                               | -0.9                                      |
|                                | RNA 1                      | 5'- r(AAGGGAAGAGAAAGA) -3'  |                                    |                                           |
| Duplex 21                      | DNA 12                     | 5'- d(TCTTTCTCTTTCCCTT) -3' | 60.3                               | +0.3                                      |
|                                | RNA 1                      | 5'- r(AAGGGAAGAGAAAGA) -3'  |                                    |                                           |
| Duplex 22                      | DNA 13                     | 5'- d(TCTTTCTCTTTCCCTT) -3' | 59.5                               | -0.5                                      |
|                                | RNA 1                      | 5'- r(AAGGGAAGAGAAAGA) -3'  |                                    |                                           |

<sup>a</sup> T(green) denotes (S)-5'-C-Aminopropyl-2'- $\beta$ -fluoro-thymidine (A4). <sup>b</sup>The  $T_m$  value were measured in 10 mM sodium phosphate buffer (pH 7.0) containing 100 mM NaCl. The concentrations of the duplexes were 3  $\mu$ M. All measurements were carried out three times, and the data are shown as an average value. <sup>c</sup> $\Delta T_m$  represents [ $T_m$  (duplex 19-22)-  $T_m$  (duplex 1)].

(a)

| Abbreviation of<br>DNA/RNA duplex | Abbreviation of DNA<br>or RNA | Sequence <sup>a</sup>          |
|-----------------------------------|-------------------------------|--------------------------------|
| Duplex 23                         | DNA 10                        | 5'- d(TCTTTCTCTTTCCCTT) -3'    |
|                                   | RNA 6                         | 5'- F - r(AAGGGAAGAGAAAGA) -3' |
| Duplex 24                         | DNA 11                        | 5'- d(TCTTTCTCTTTCCCTT) -3'    |
|                                   | RNA 6                         | 5'- F - r(AAGGGAAGAGAAAGA) -3' |
| Duplex 25                         | DNA 12                        | 5'- d(TCTTTCTCTTCCCTT) -3'     |
|                                   | RNA 6                         | 5'- F - r(AAGGGAAGAGAAAGA) -3' |
| Duplex 26                         | DNA 13                        | 5'- d(TCTTTCTCTTTCCCTT) -3'    |
|                                   | RNA 6                         | 5'- F - r(AAGGGAAGAGAAAGA) -3' |

<sup>a</sup>F(orange) and T(green) denote fluorescein and (S)-5'-C-Aminopropyl-2'-β-fluoro-thymidine (A4), respectively.

(b)

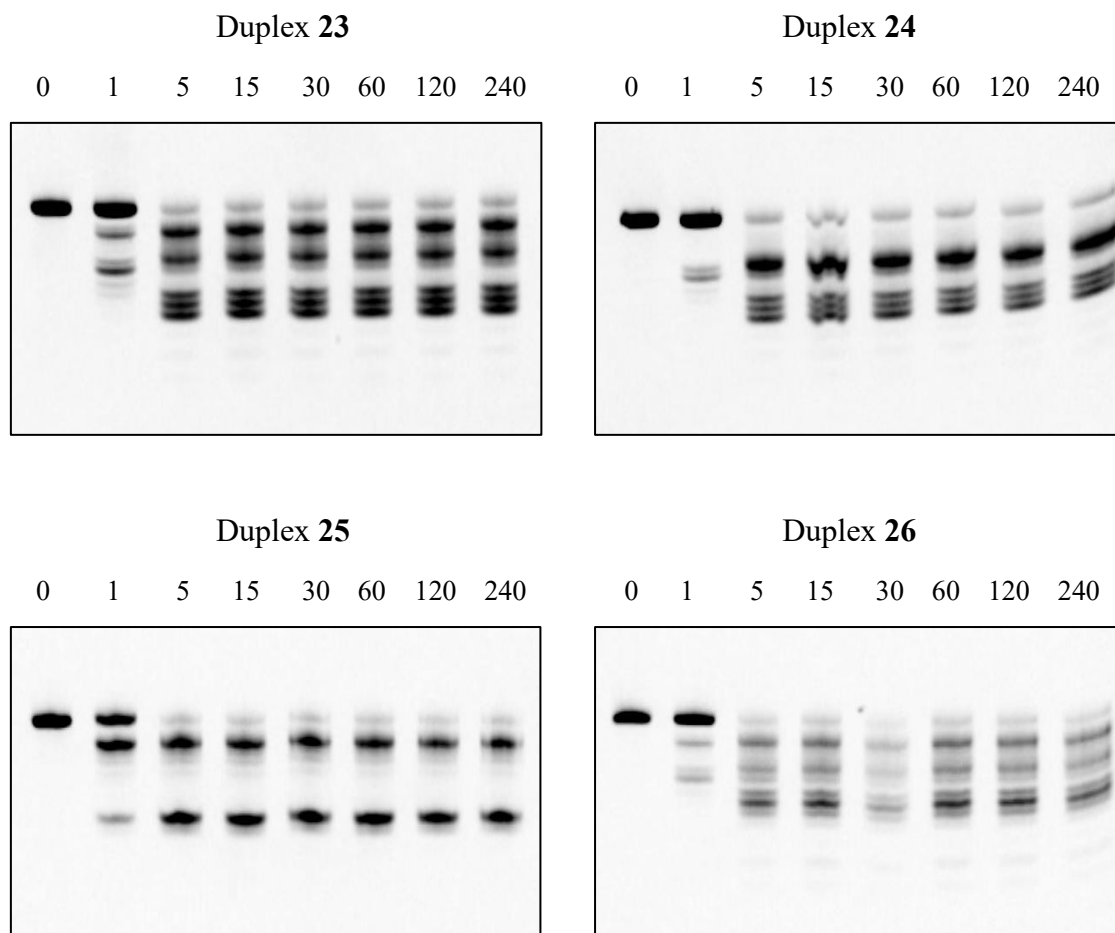

**Figure S8. RNase H-mediated cleavage assays: the sequences of duplex 20-23 (a) and the images of PAGE analysis (b).** PAGE analysis of DNA/RNA duplexes treated in a buffer containing 50 mM Tris-HCl (pH 8.0), 75 mM KCl, 3 mM MgCl<sub>2</sub>, 10 mM dithiothreitol, and RNase H from *E.coli*. The duplexes **23-26** were incubated in a buffer containing 50 mM Tris-HCl (pH 8.0), 75 mM KCl, 3 mM MgCl<sub>2</sub> and 10 mM dithiothreitol, and then diluted RNase H solution (60 unit/L in H<sub>2</sub>O) was added, and subsequently the mixture was incubated at 37°C for the required time. The reaction mixtures at various incubation time (0, 1, 5, 15, 30, 60, 120, 240 min) were analyzed by 20% PAGE.

# NMR spectra ( $^1\text{H}$ , $^{13}\text{C}$ , $^{19}\text{F}$ , $^{31}\text{P}$ and NOESY)

## $^1\text{H}$ NMR spectrum of compound 2

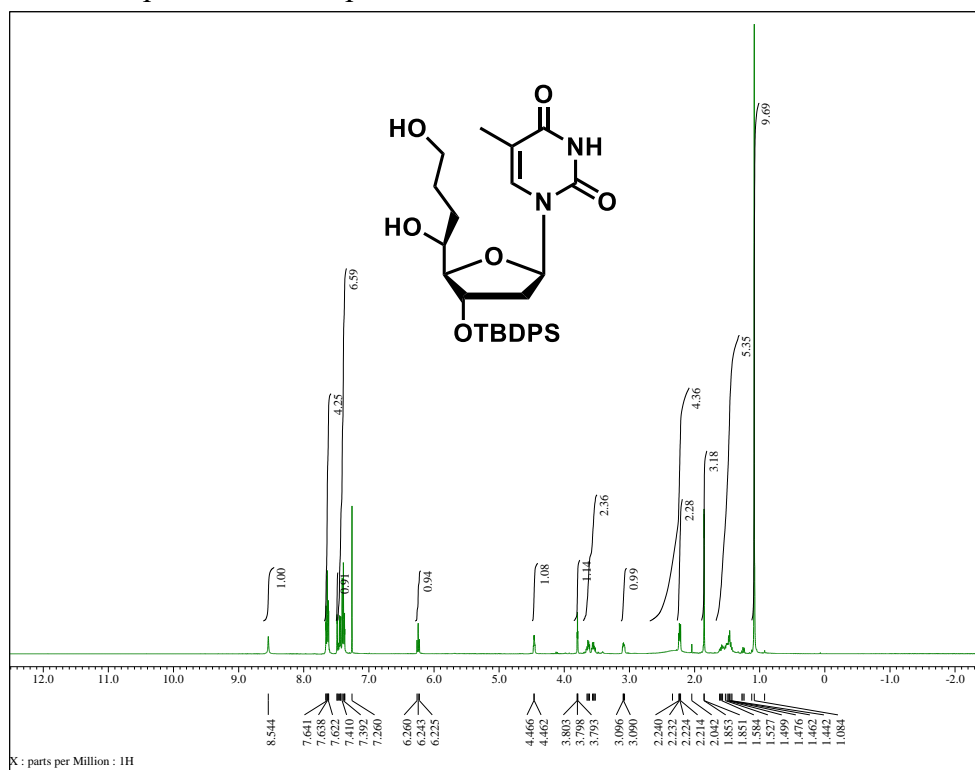

## $^{13}\text{C}$ NMR spectrum of compound 2

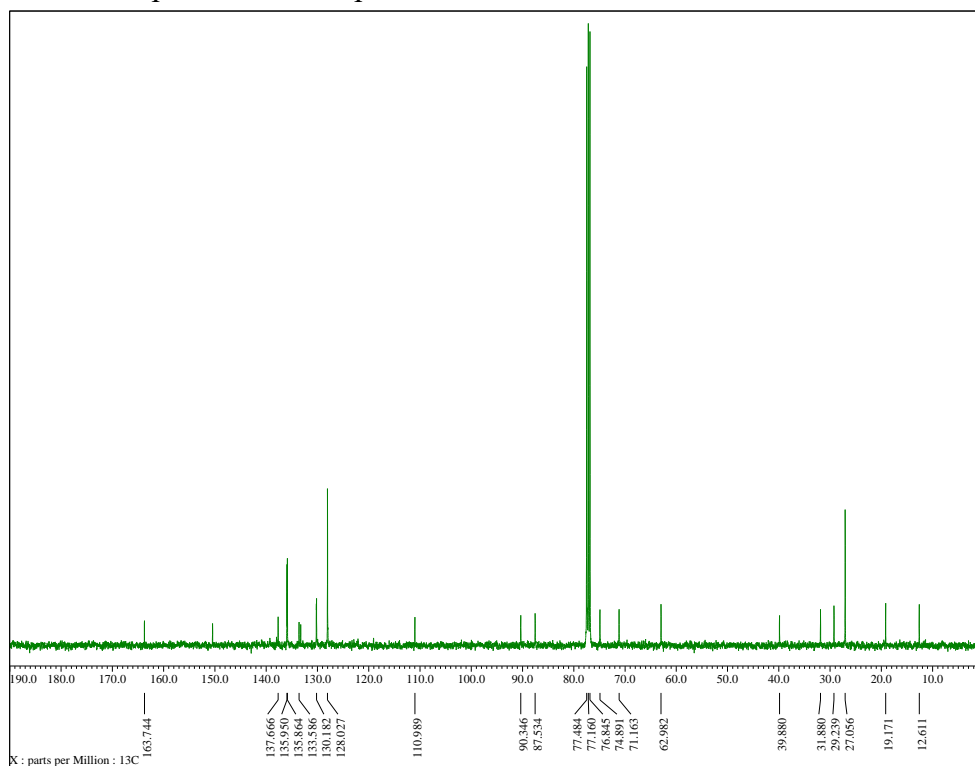

<sup>1</sup>H NMR spectrum of compound 3

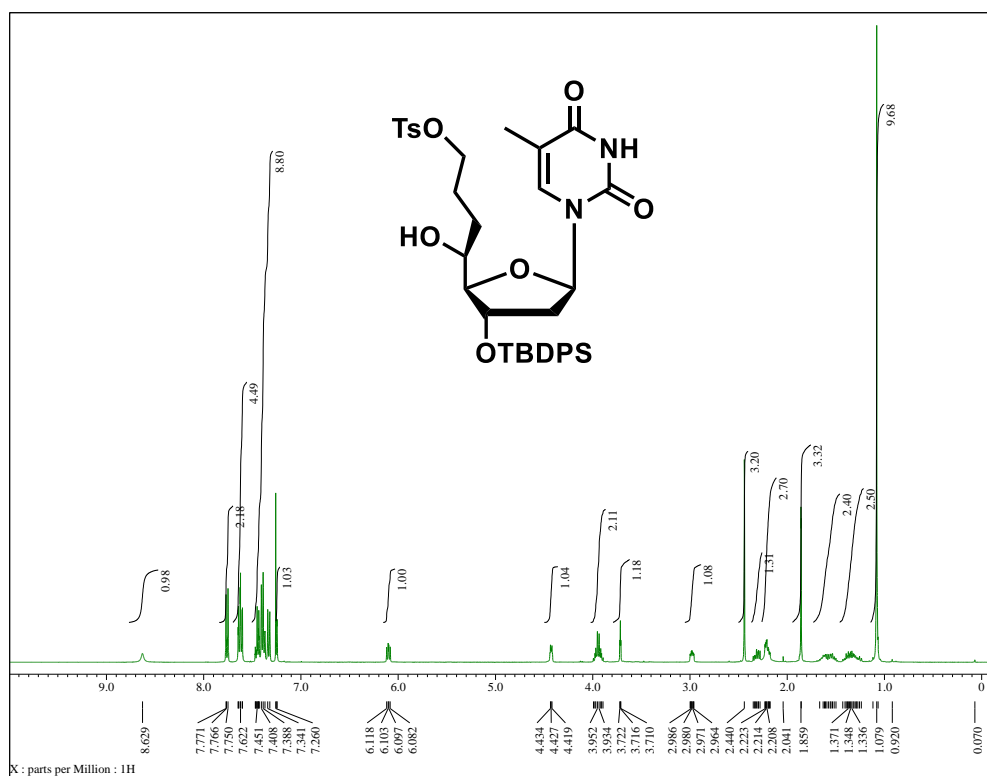

<sup>13</sup>C NMR spectrum of compound 3

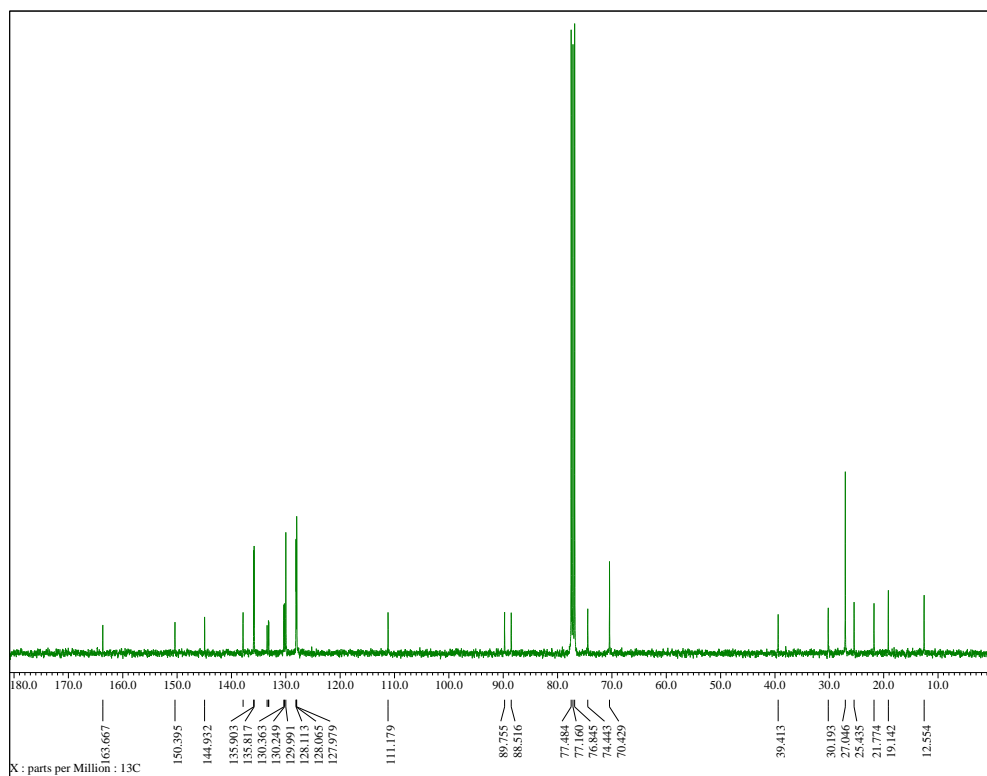



<sup>1</sup>H NMR spectrum of compound 4

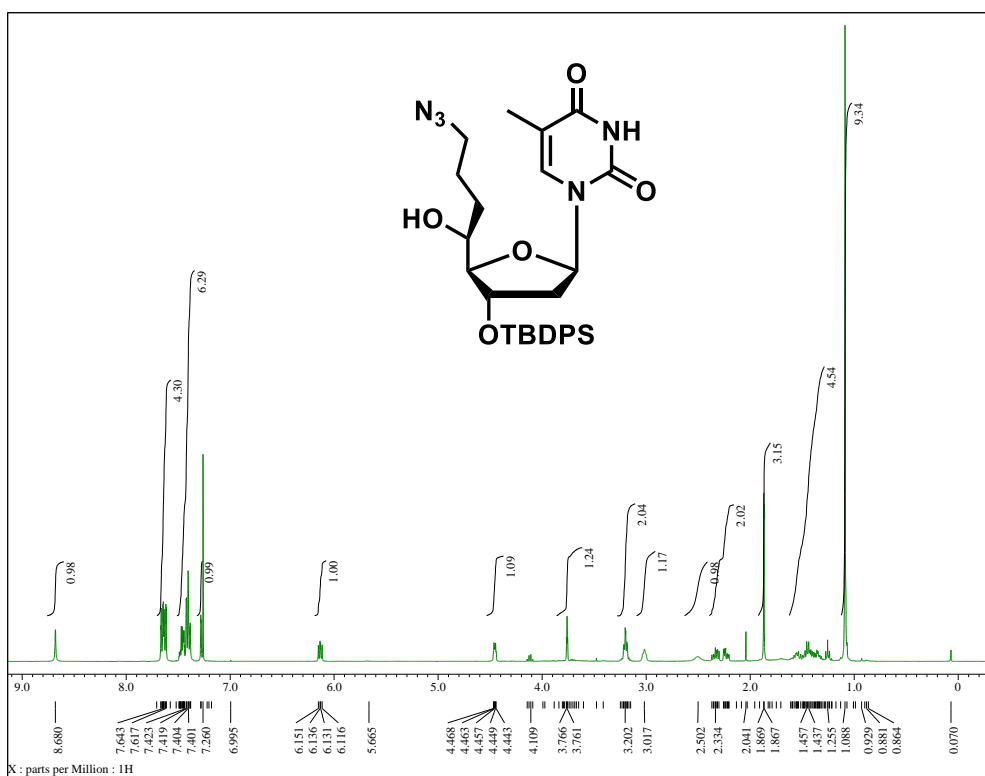

<sup>13</sup>C NMR spectrum of compound 4

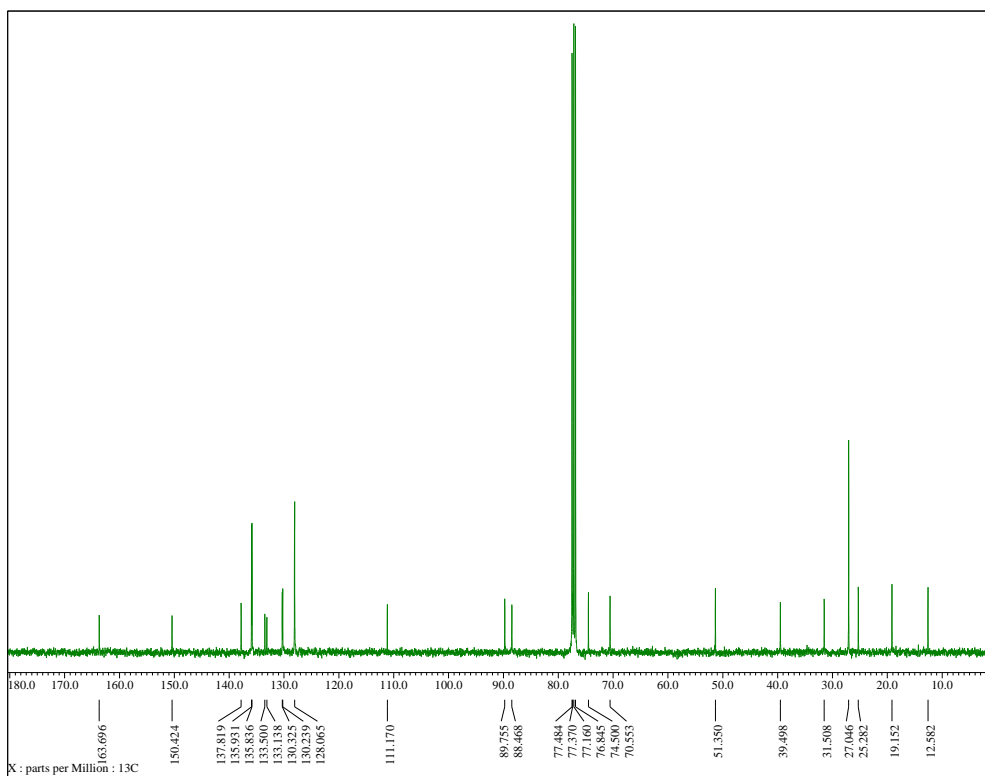

# <sup>1</sup>H NMR spectrum of compound 5

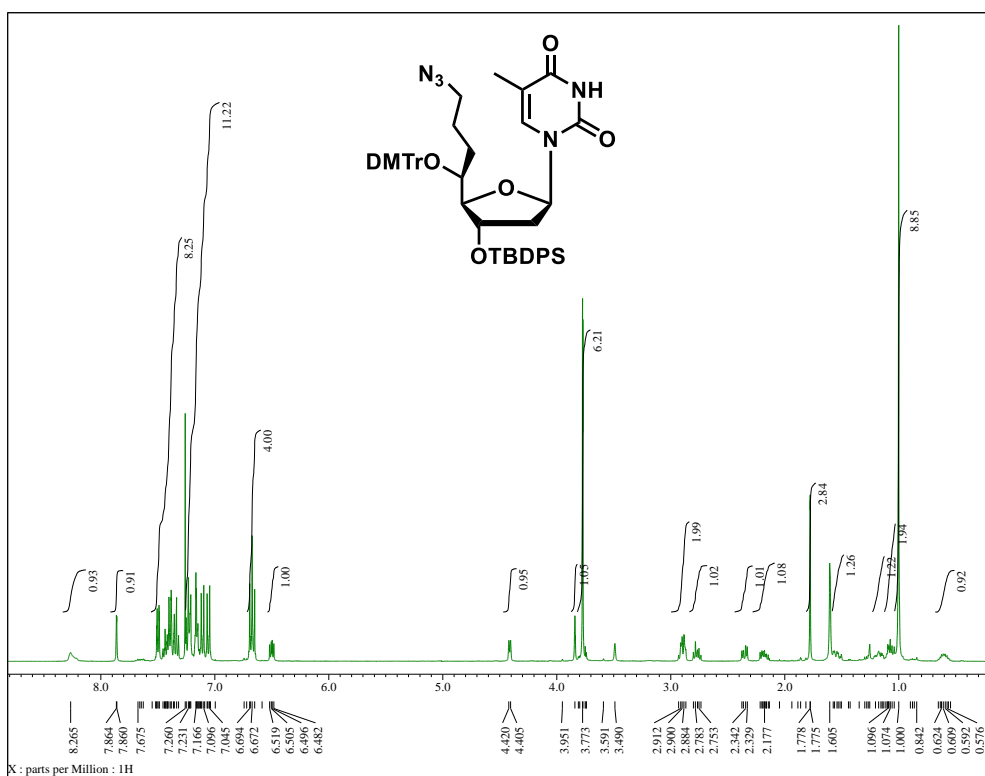

# <sup>13</sup>C NMR spectrum of compound 5

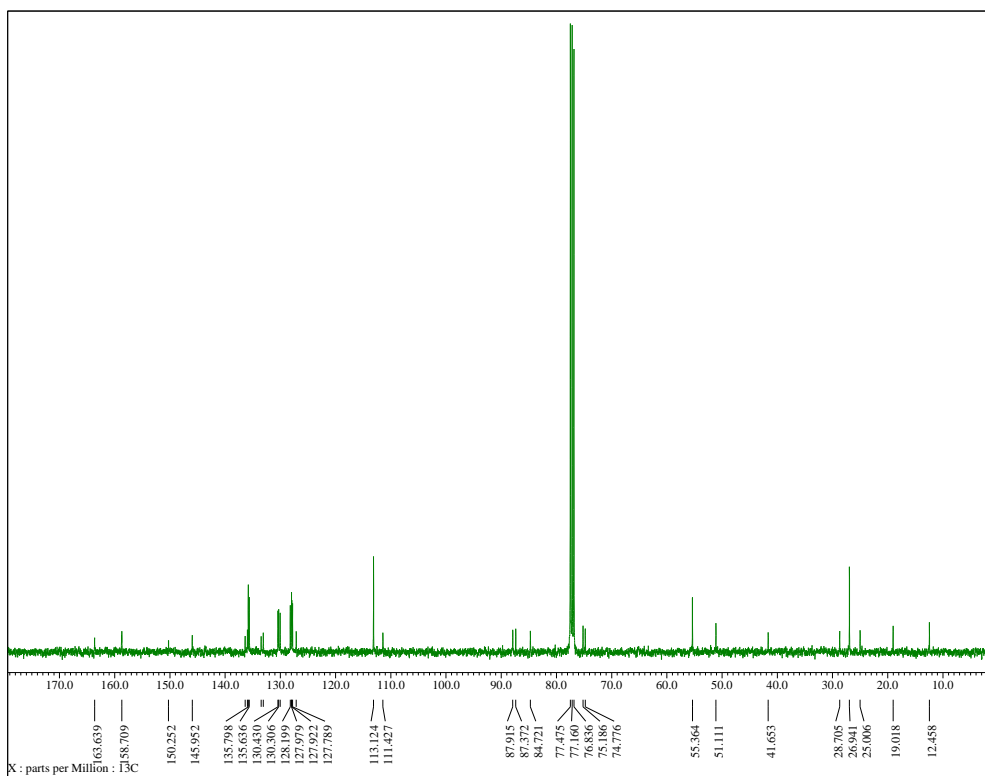

<sup>1</sup>H NMR spectrum of compound **6**

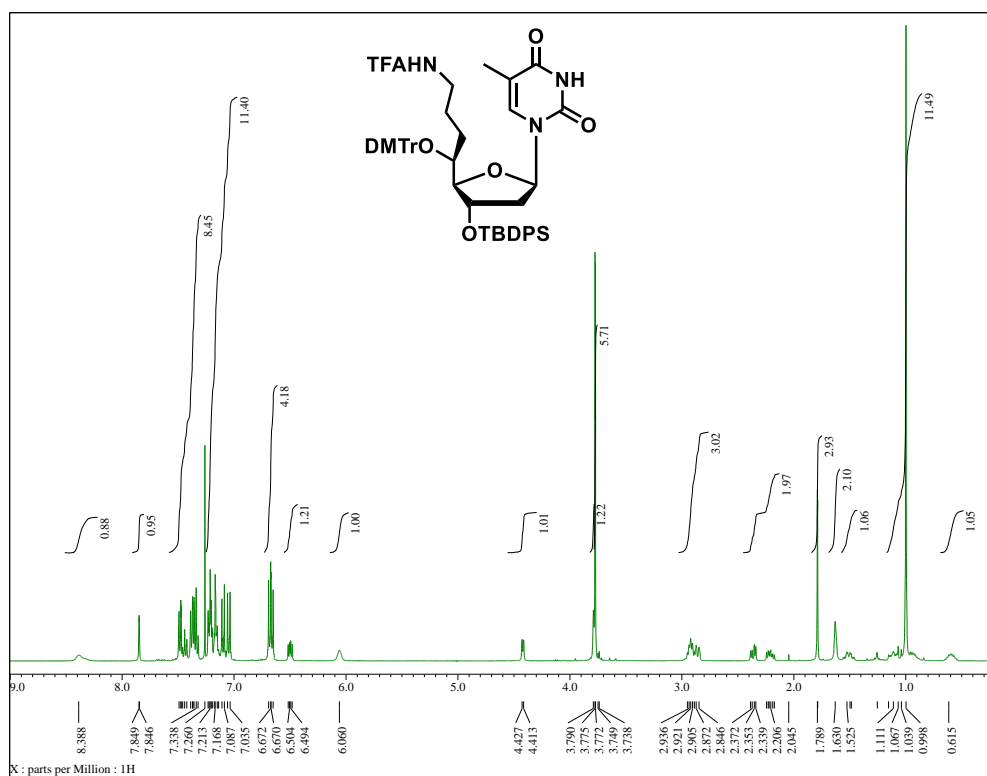

<sup>13</sup>C NMR spectrum of compound **6**

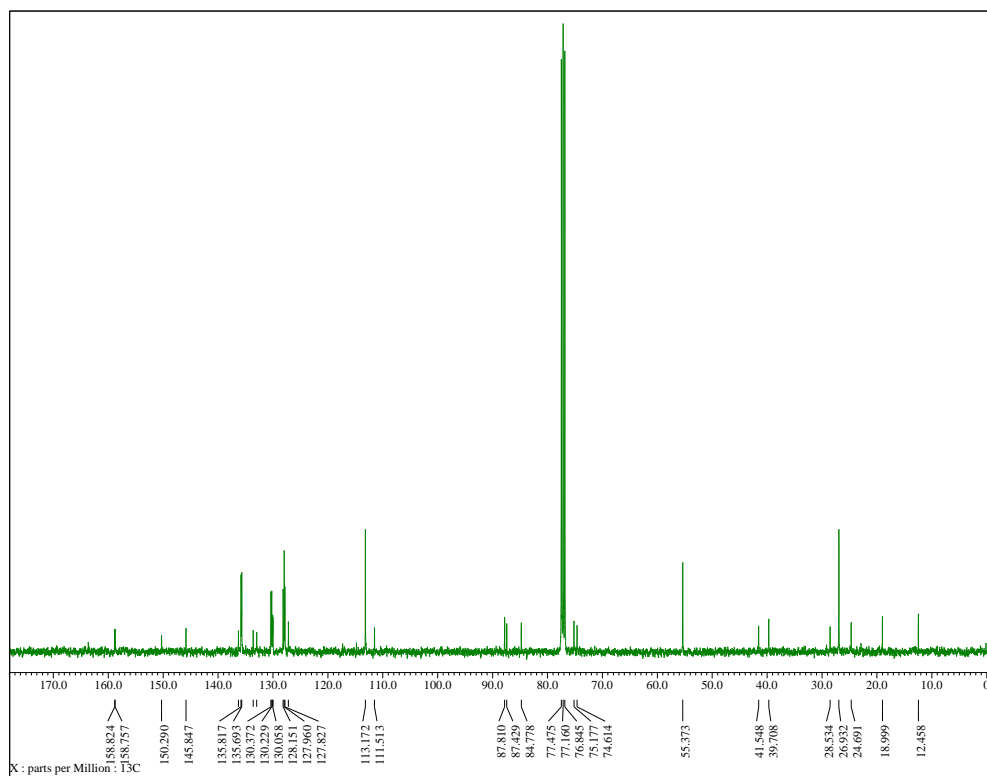

<sup>1</sup>H NMR spectrum of compound 7

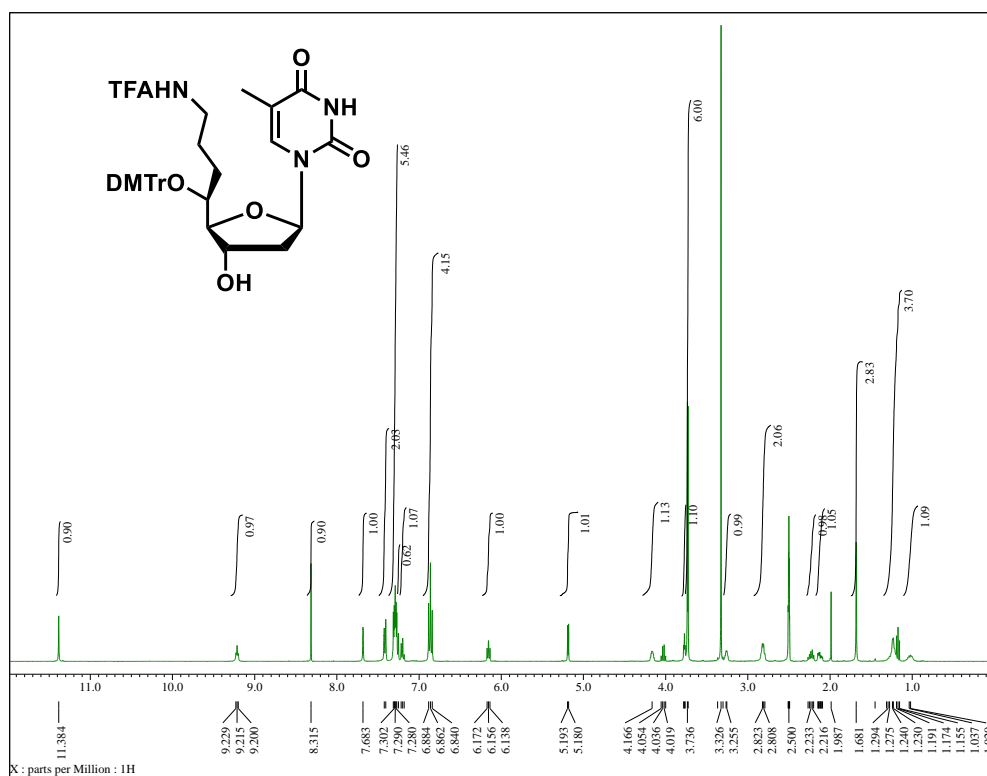

<sup>13</sup>C NMR spectrum of compound 7

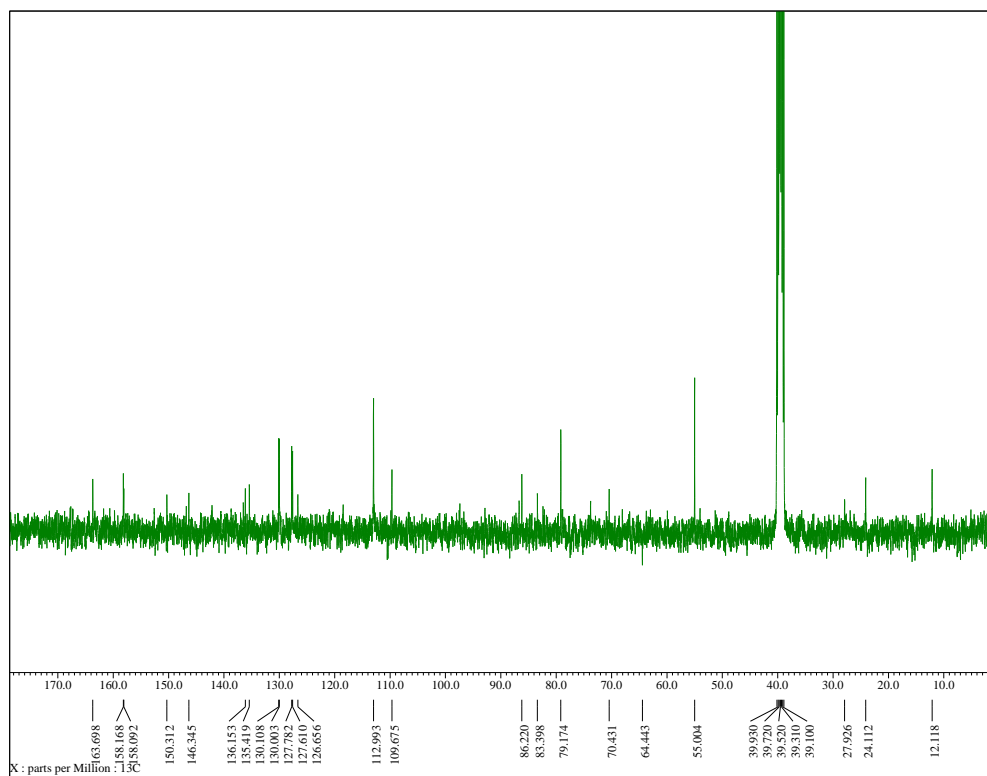

$^{31}\text{P}$  NMR spectrum of compound **8**

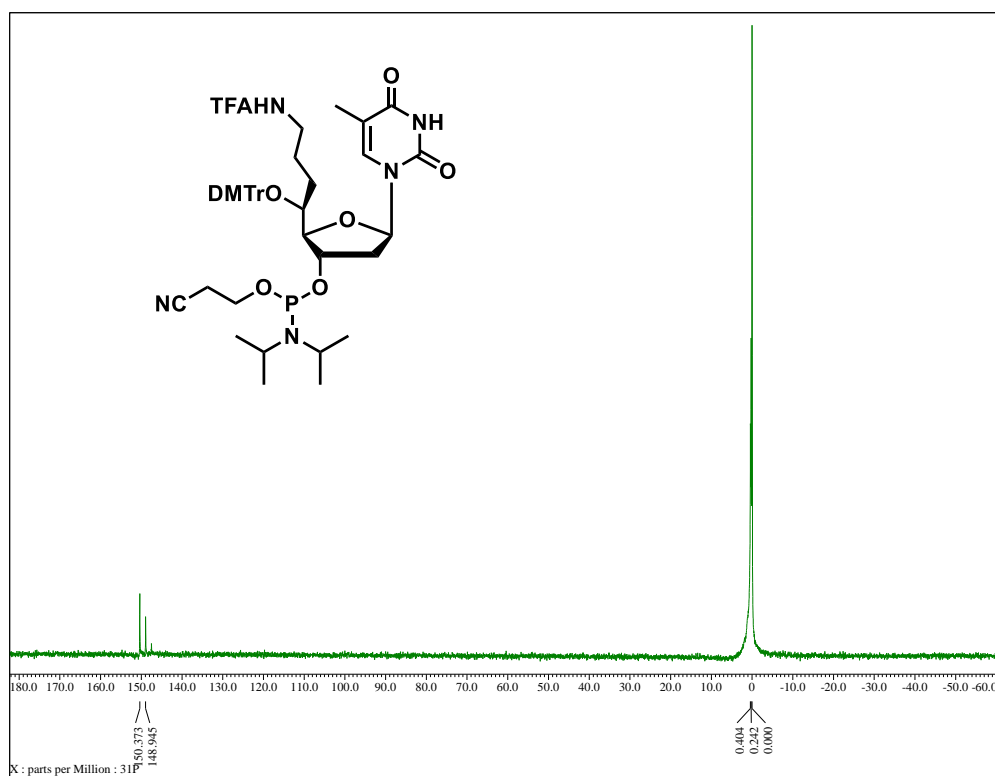

$^1\text{H}$  NMR spectrum of compound **13**

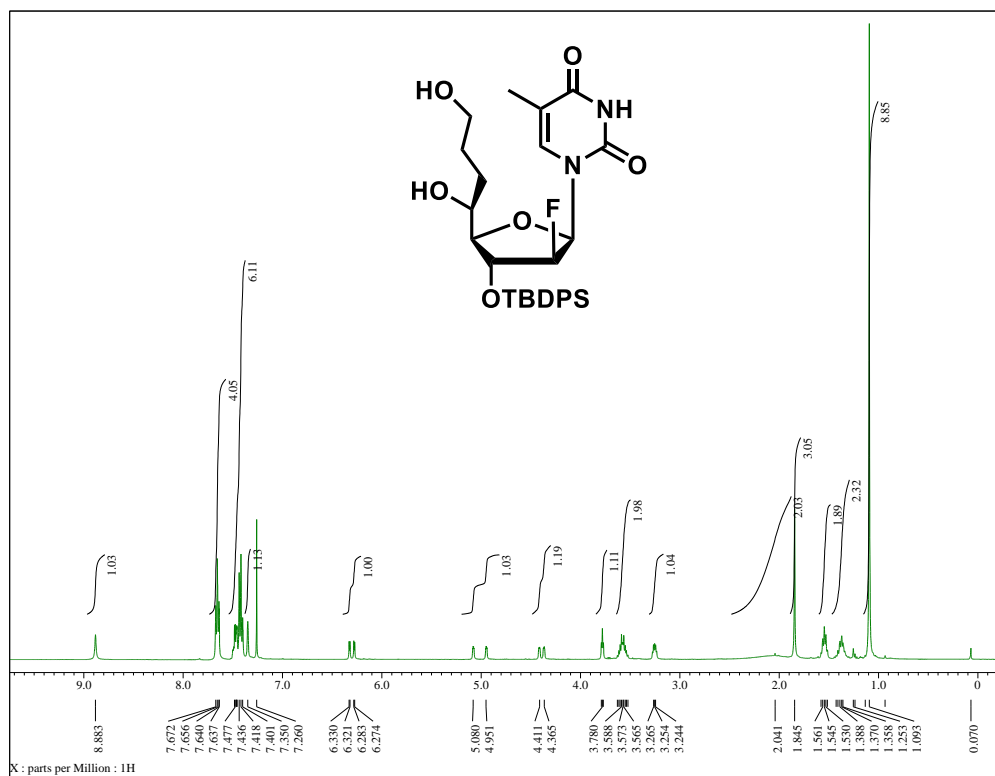

$^{13}\text{C}$  NMR spectrum of compound **13**

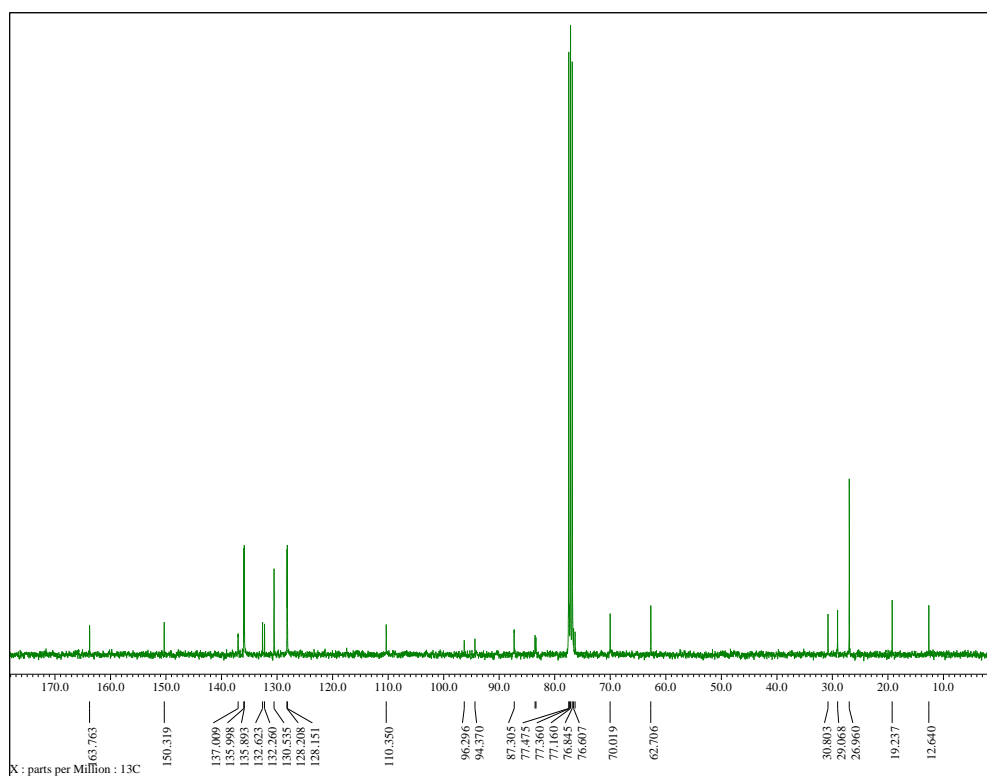

$^{19}\text{F}$  NMR spectrum of compound **13**

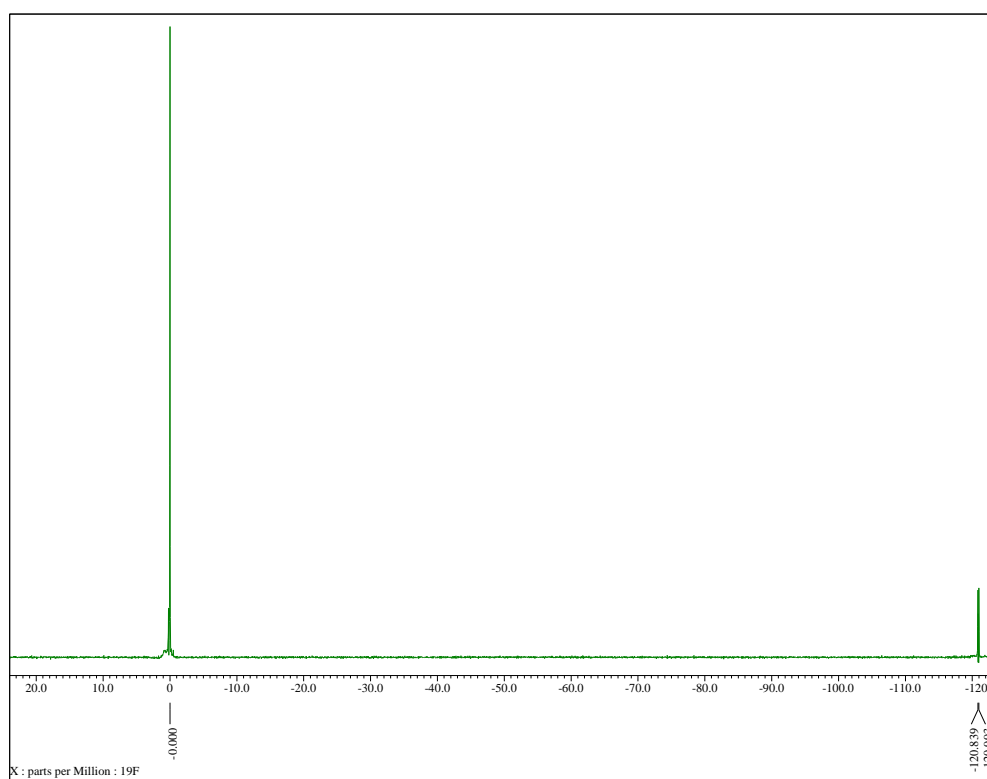

# <sup>1</sup>H NMR spectrum of compound 14

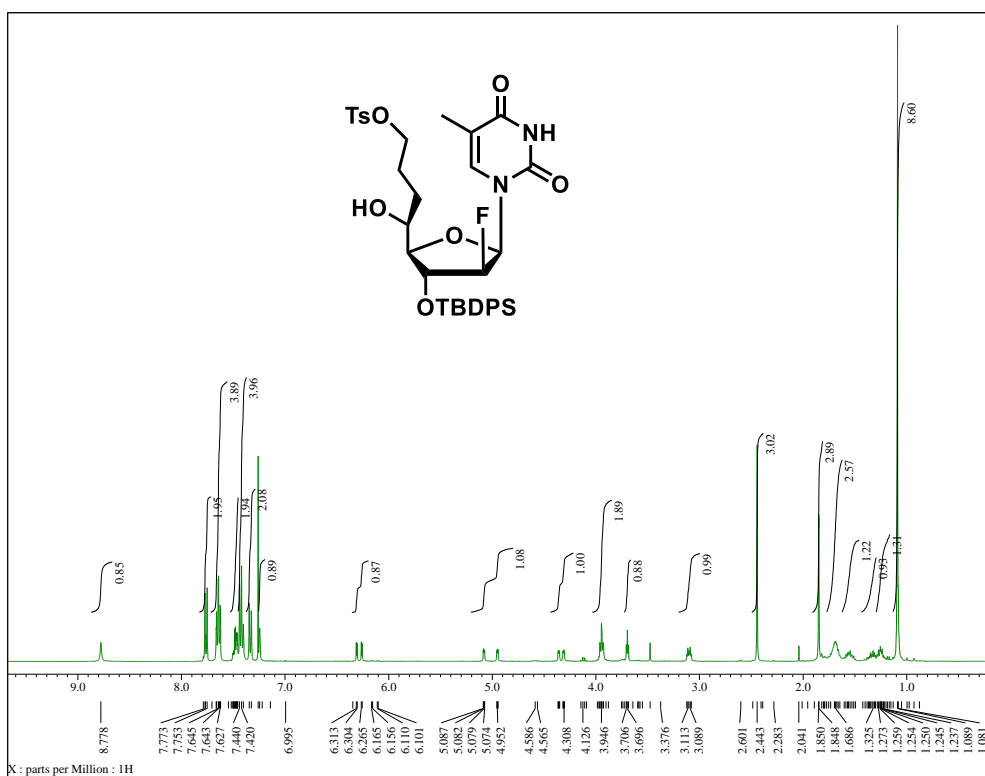

# <sup>13</sup>C NMR spectrum of compound 14

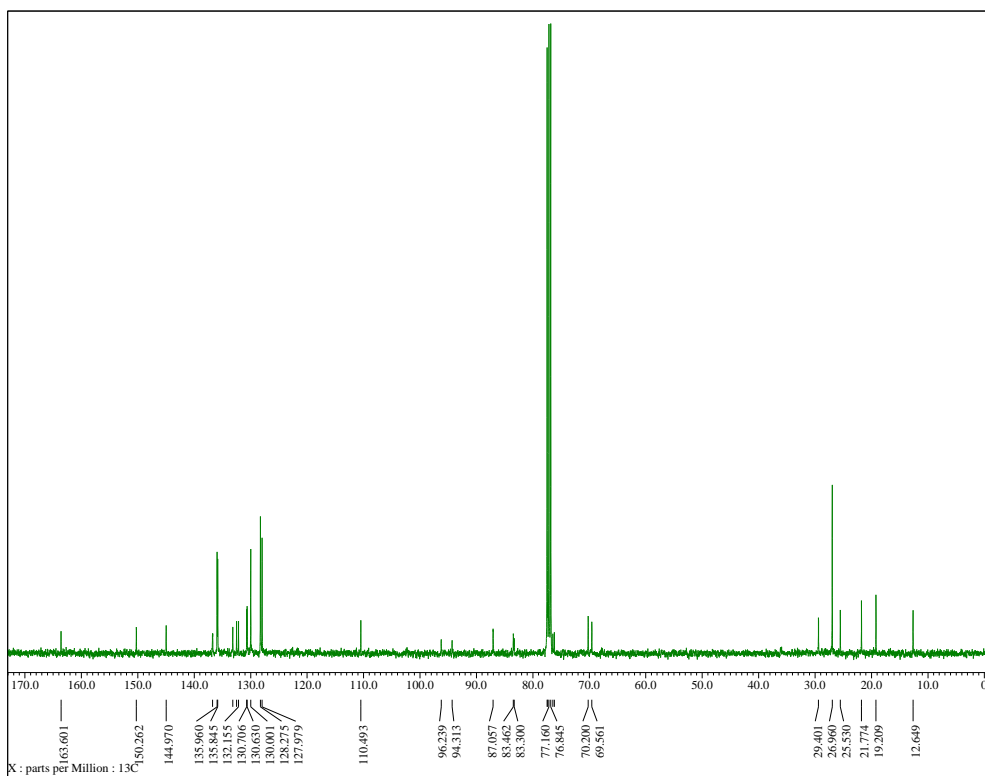

<sup>19</sup>F NMR spectrum of compound 14

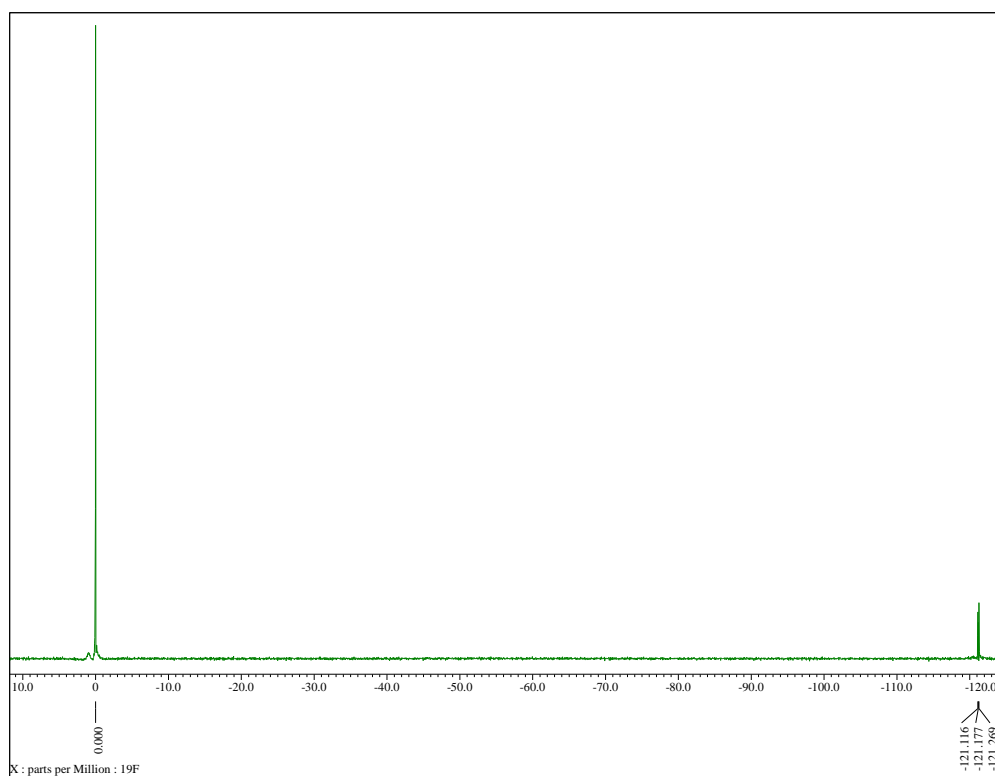

<sup>1</sup>H NMR spectrum of compound 15

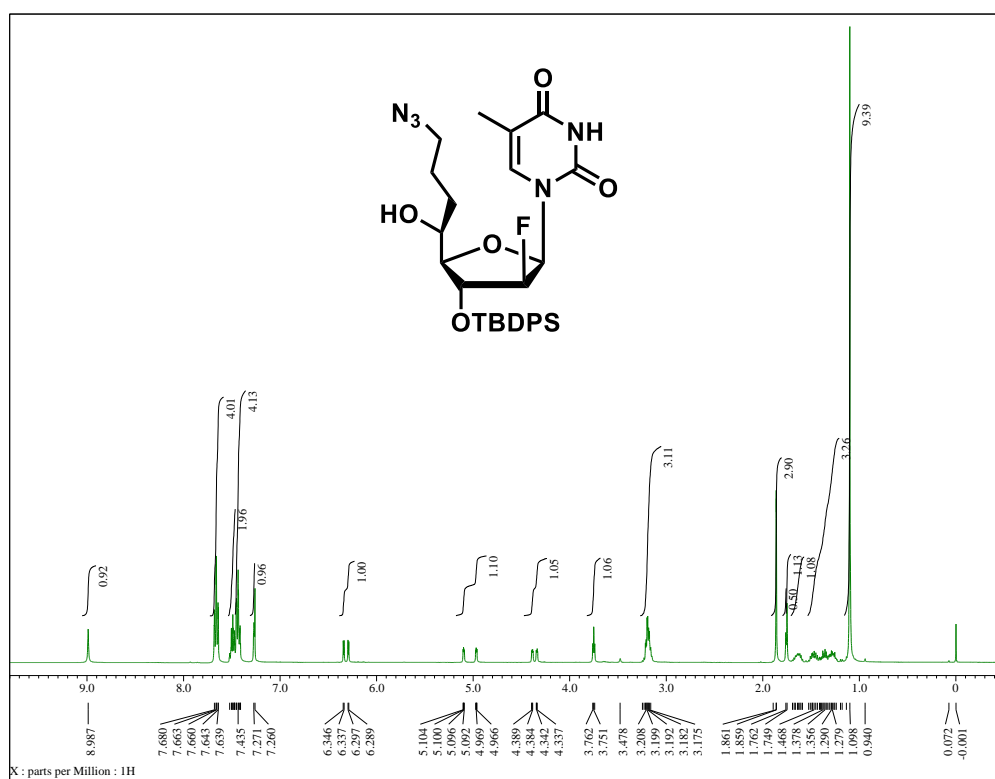



$^{13}\text{C}$  NMR spectrum of compound **15**

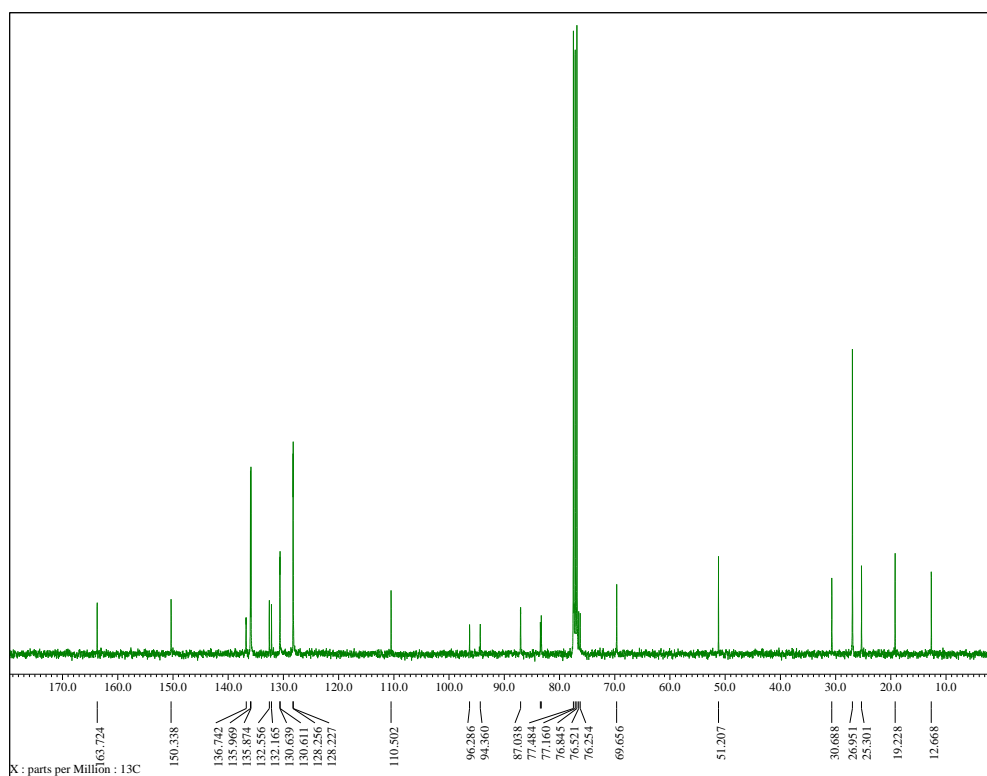

$^{19}\text{F}$  NMR spectrum of compound **15**

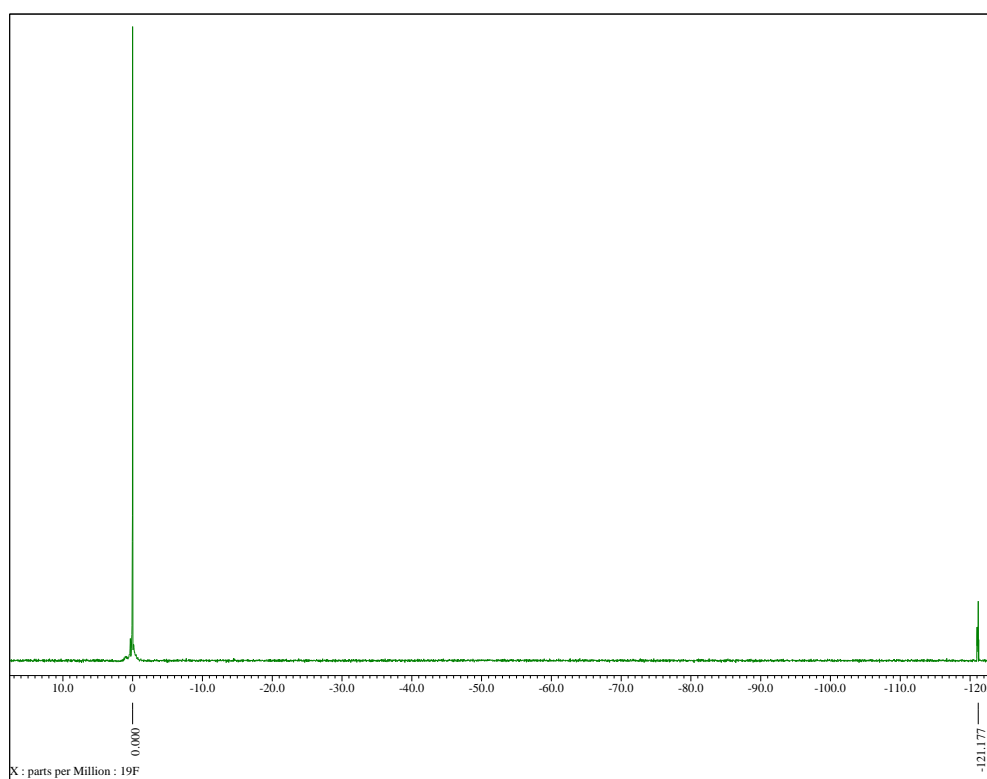

<sup>1</sup>H NMR spectrum of compound 16

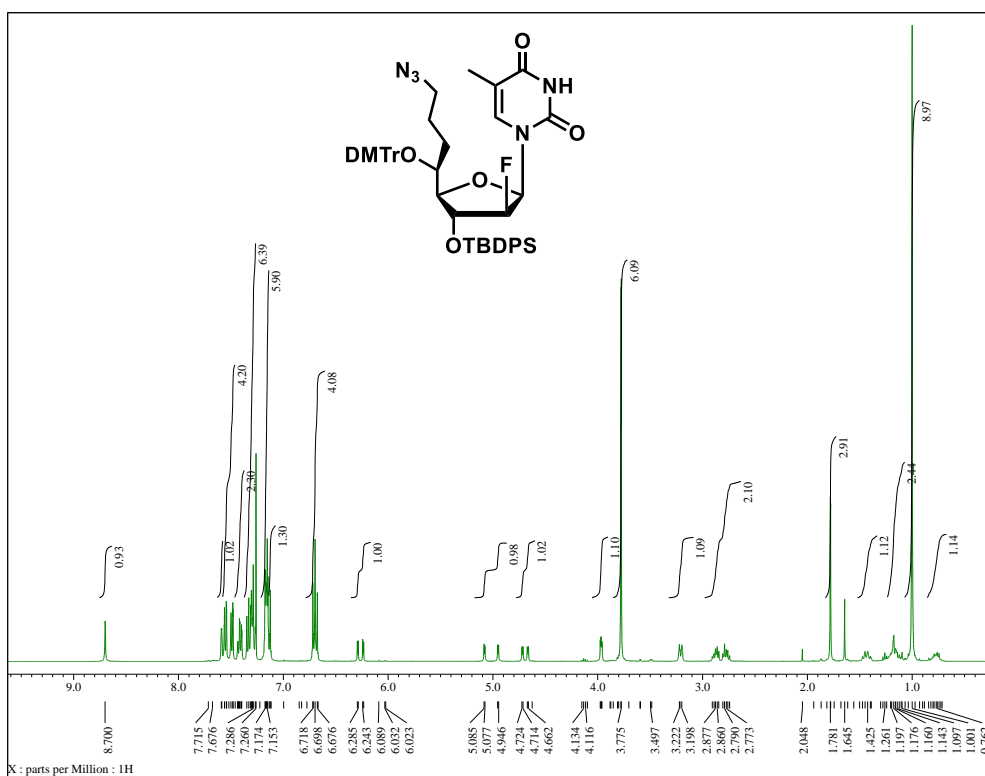

<sup>13</sup>C NMR spectrum of compound 16

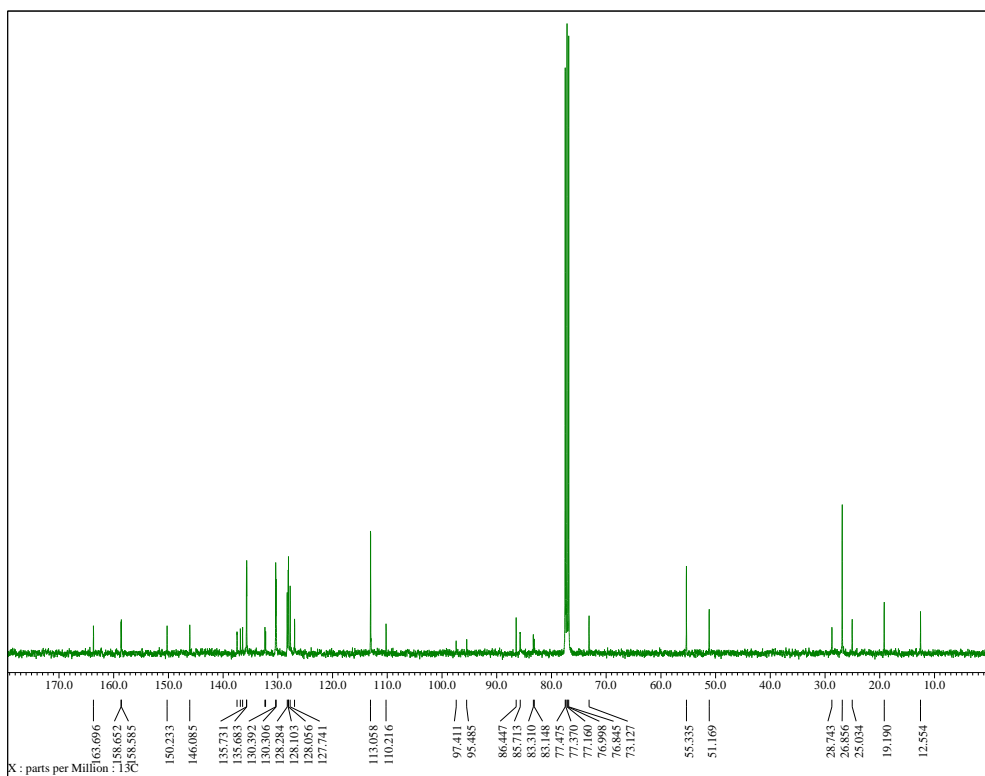

$^{19}\text{F}$  NMR spectrum of compound **16**

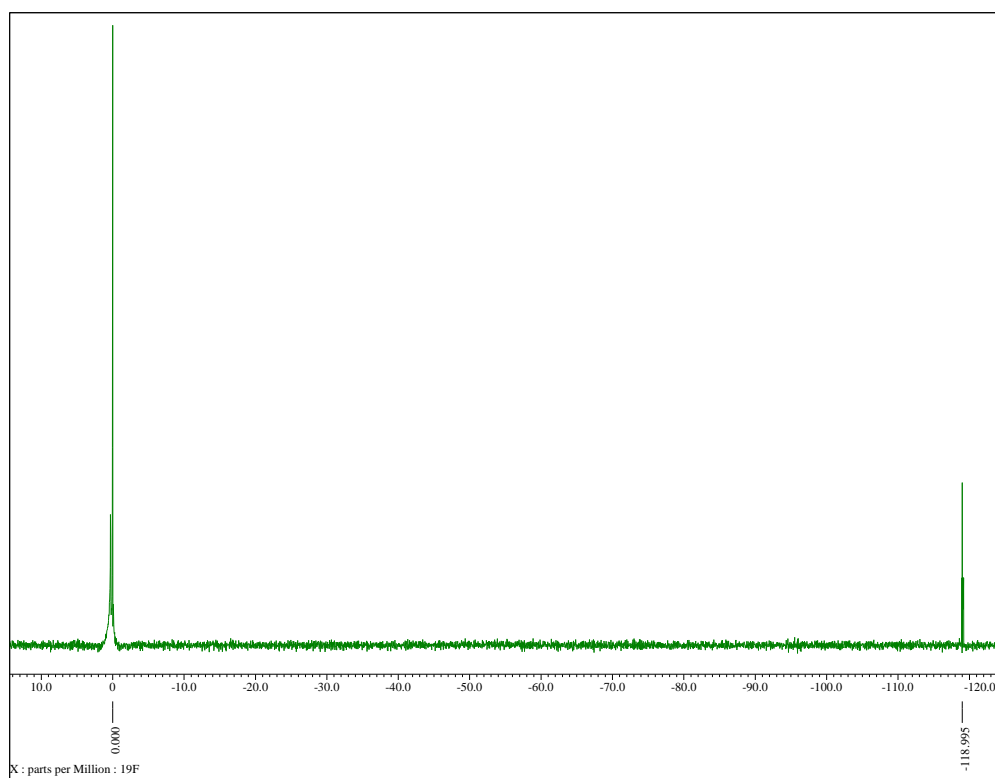

$^1\text{H}$  NMR spectrum of compound **17**

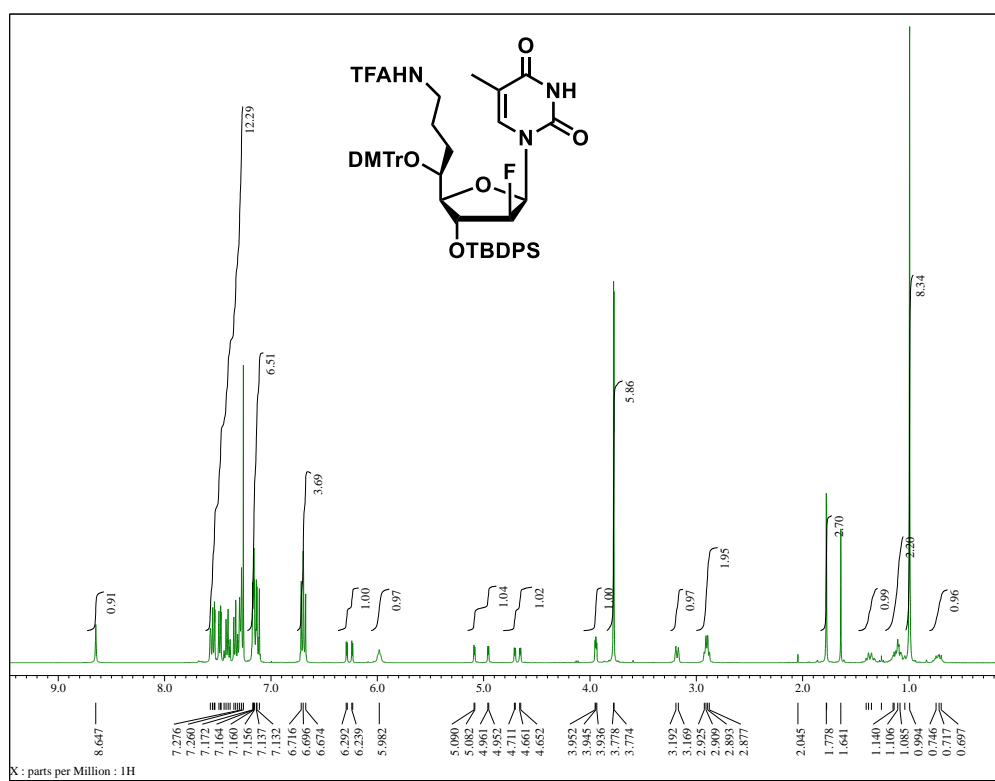

<sup>13</sup>C NMR spectrum of compound **17**

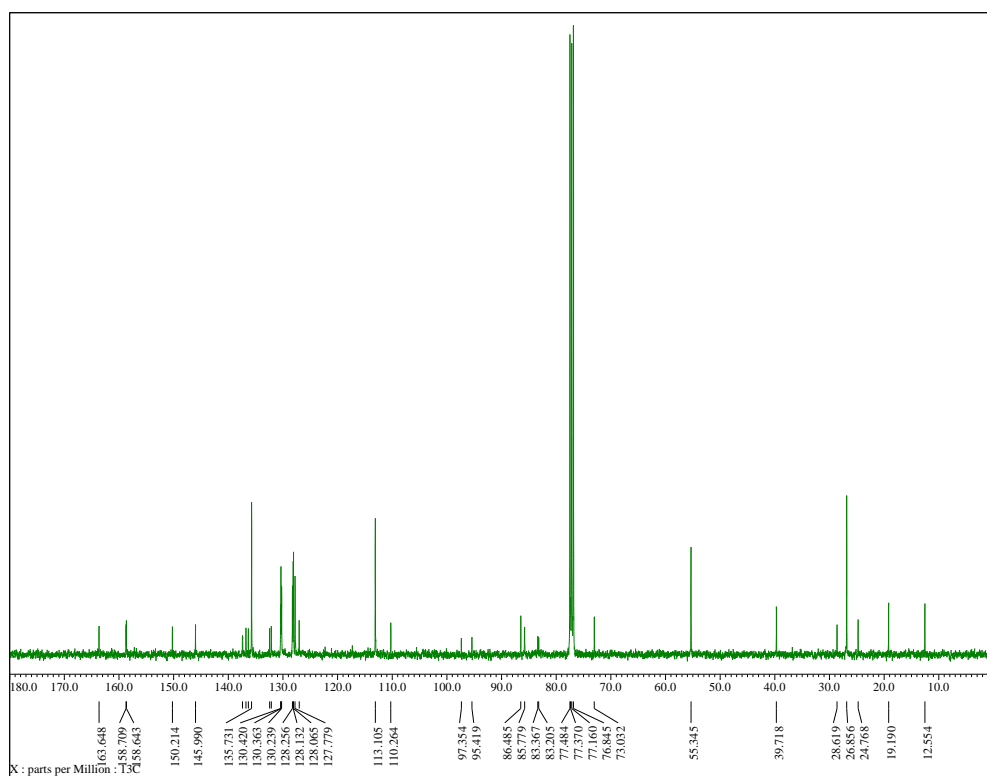

<sup>19</sup>F NMR spectrum of compound **17**

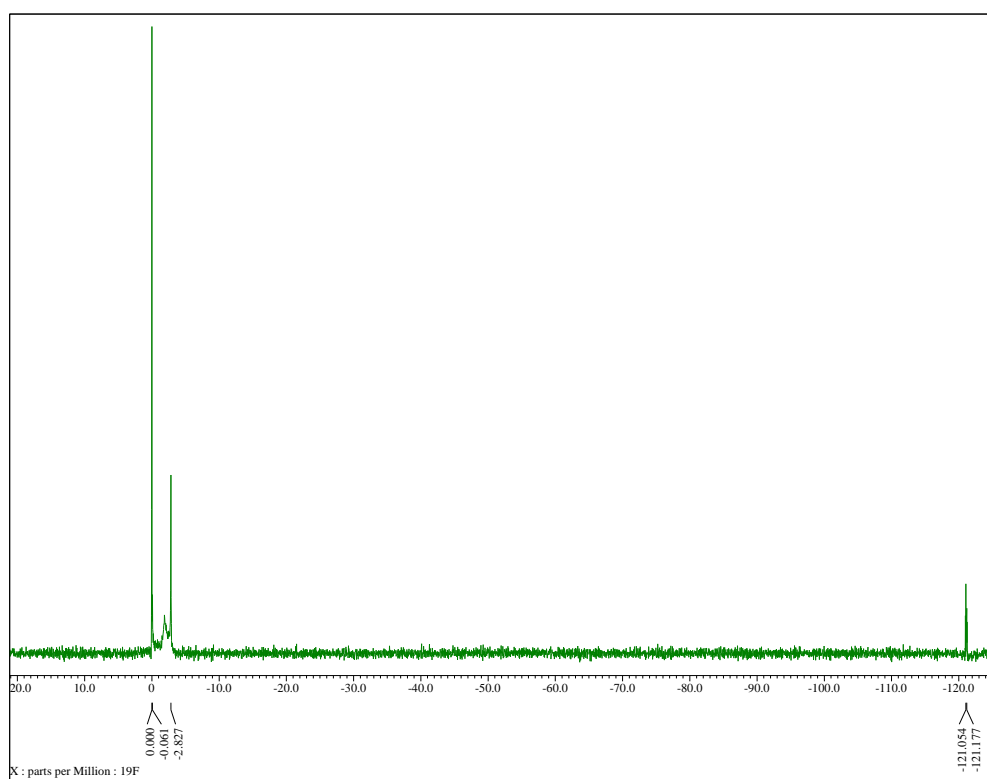

# <sup>1</sup>H NMR spectrum of compound 18

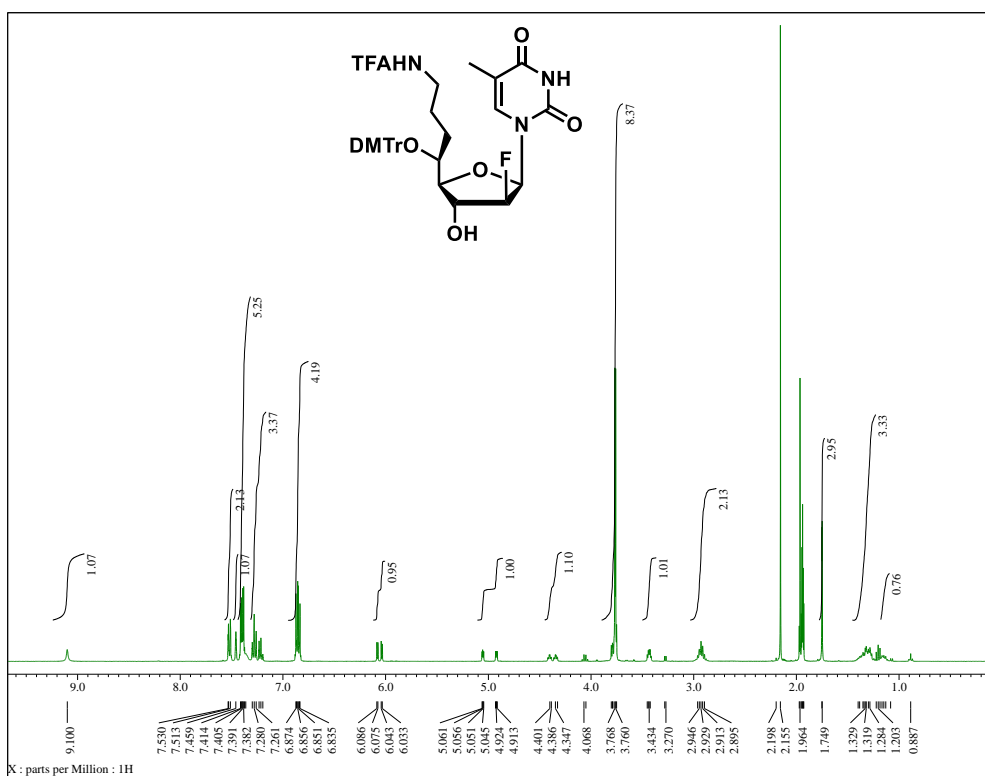

# <sup>13</sup>C NMR spectrum of compound 18

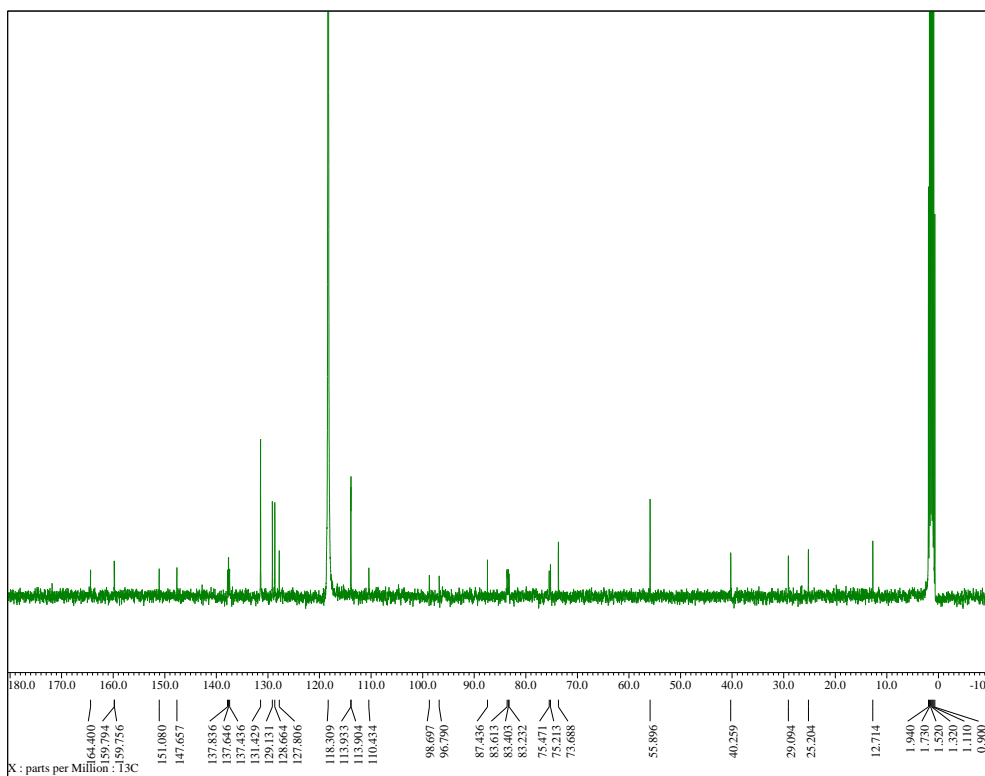

<sup>19</sup>F NMR spectrum of compound **18**

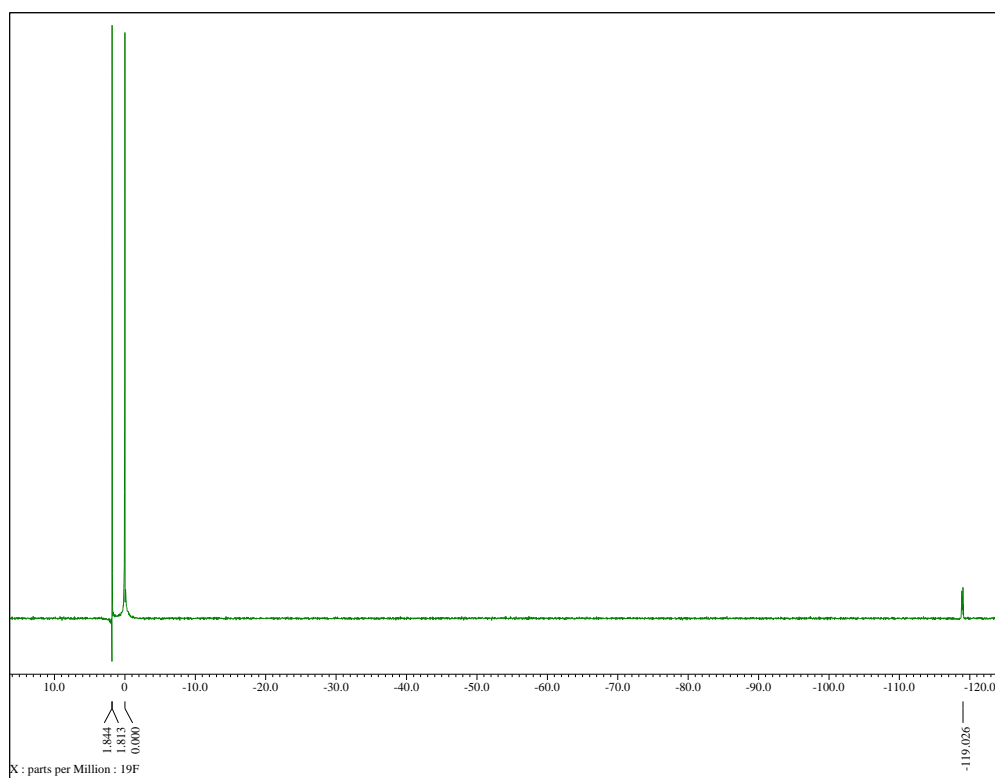

<sup>19</sup>F NMR spectrum of compound **19**

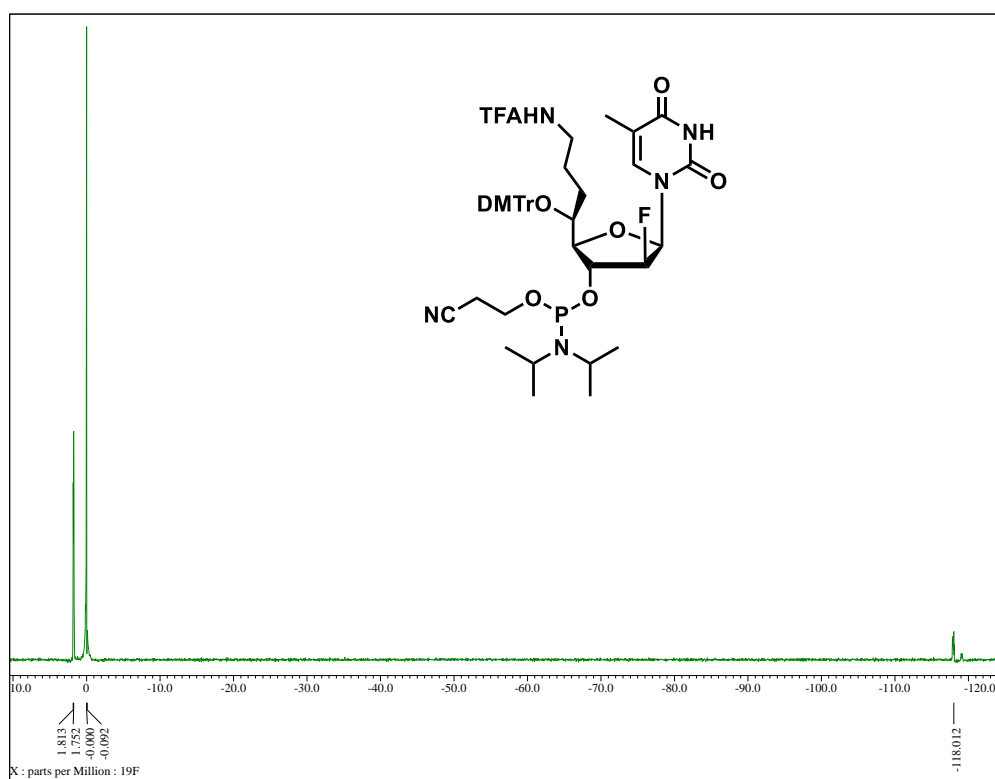

<sup>31</sup>P NMR spectrum of compound **19**

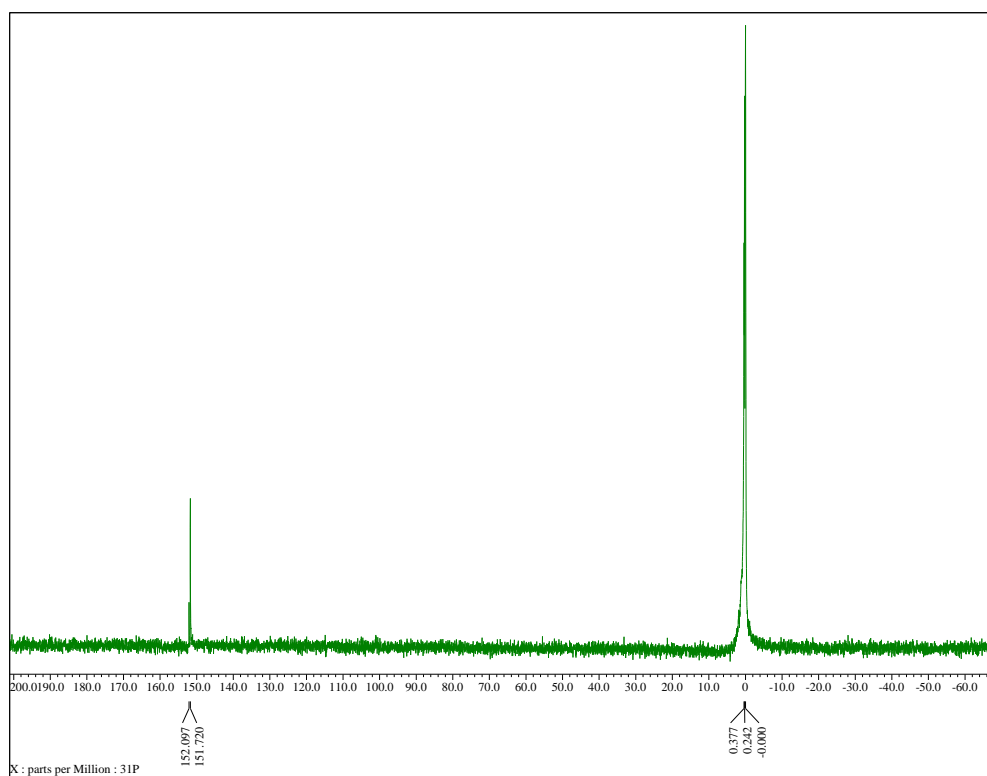

<sup>1</sup>H NMR spectrum of compound **20**

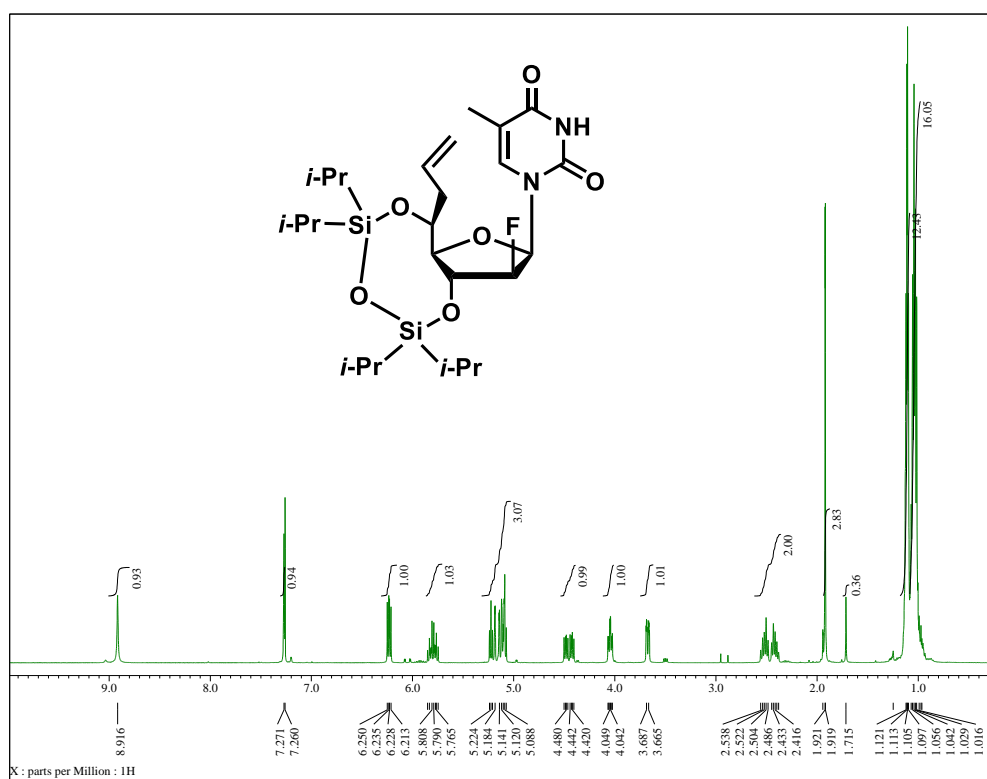

$^{13}\text{C}$  NMR spectrum of compound **20**

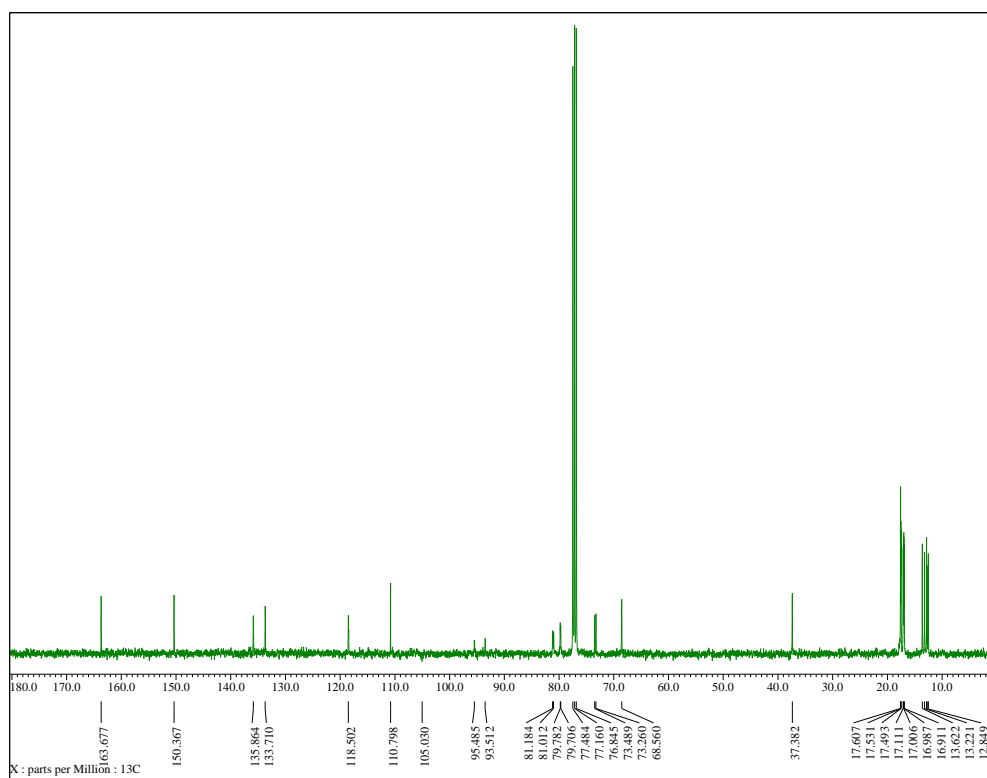

$^{19}\text{F}$  NMR spectrum of compound **20**

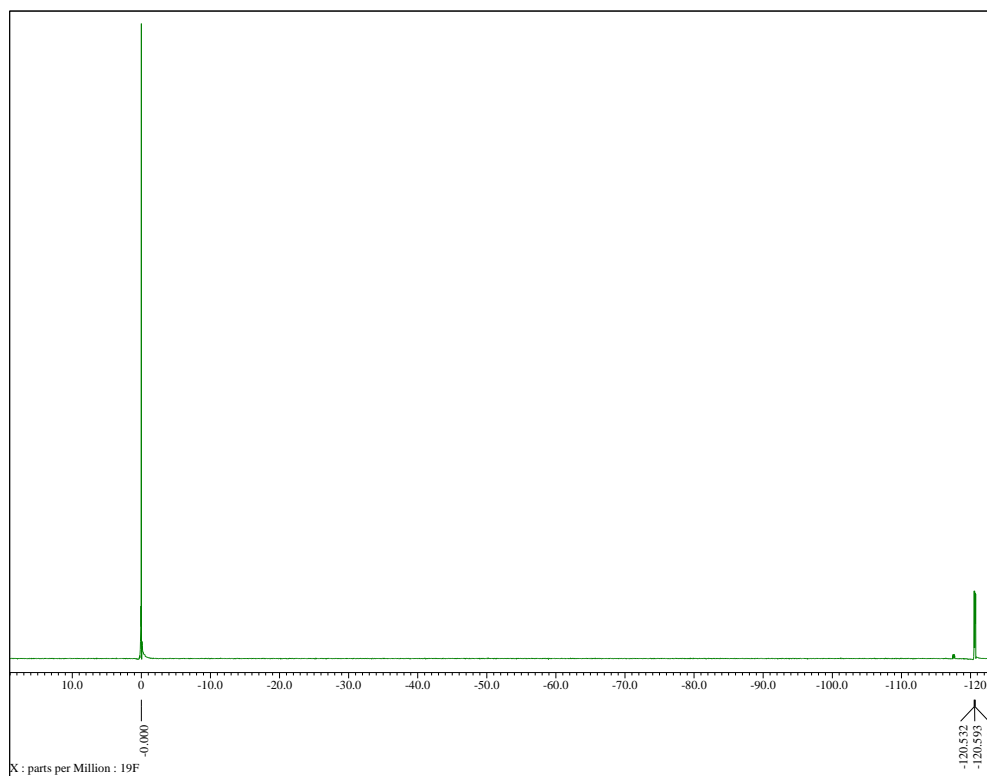



$^1\text{H}$  NOESY spectrum of compound **20**

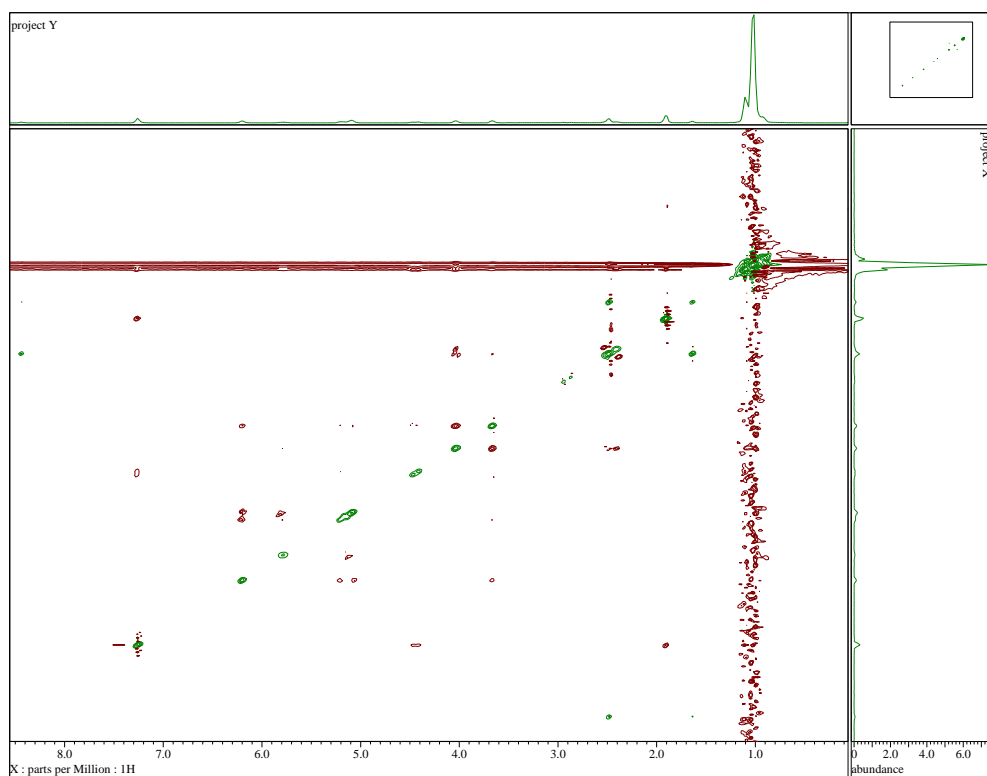

(Enlargement of H-3', H-4' and H-5')

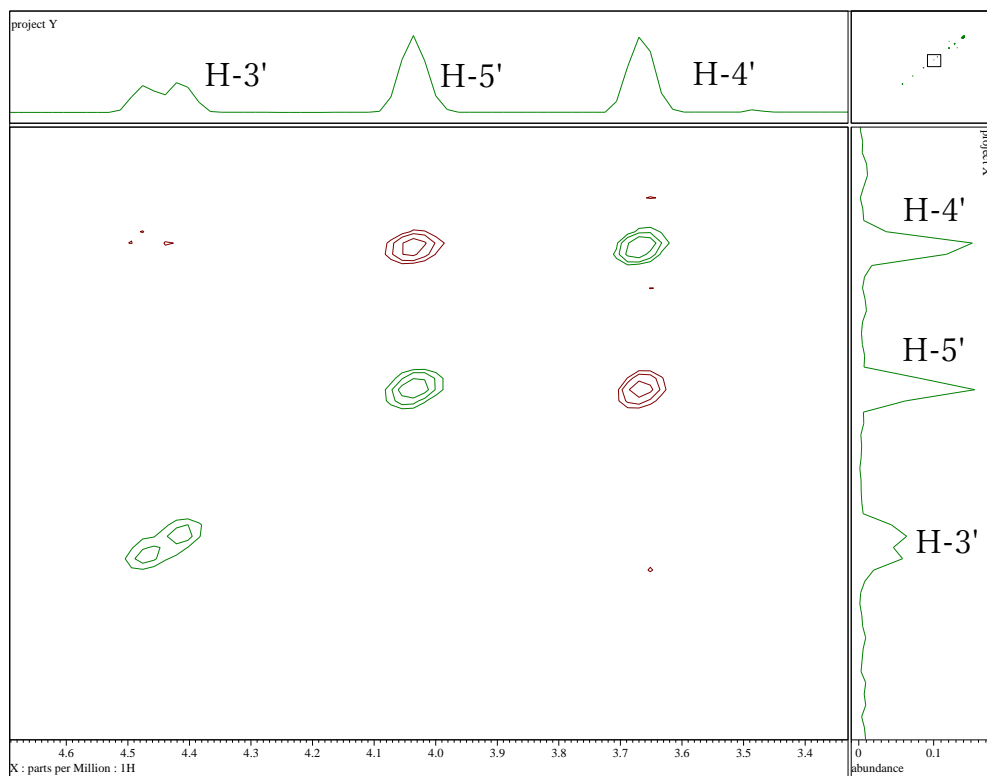

<sup>1</sup>H NMR spectrum of compound 21

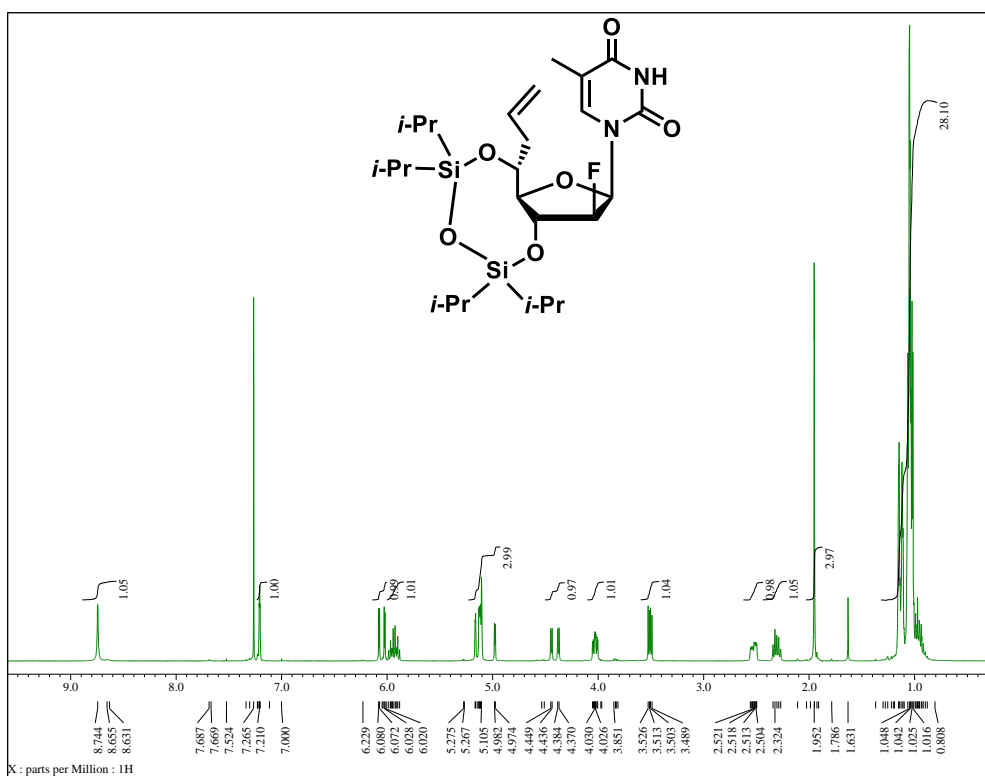

<sup>13</sup>C NMR spectrum of compound 21

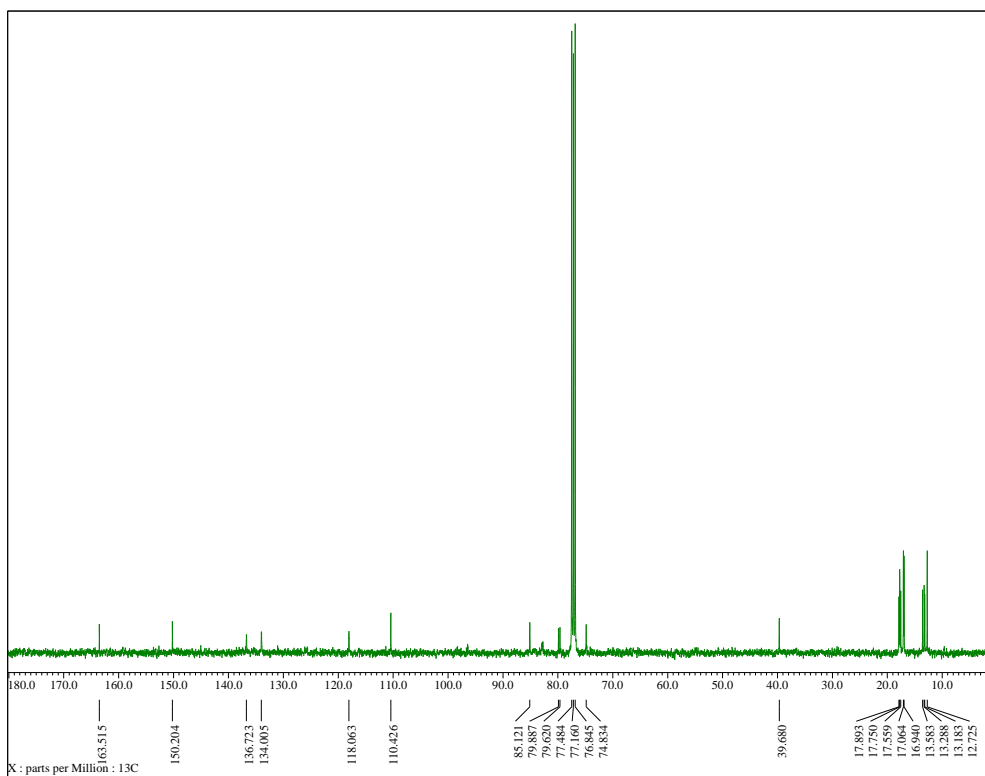

$^{19}\text{F}$  NMR spectrum of compound **21**

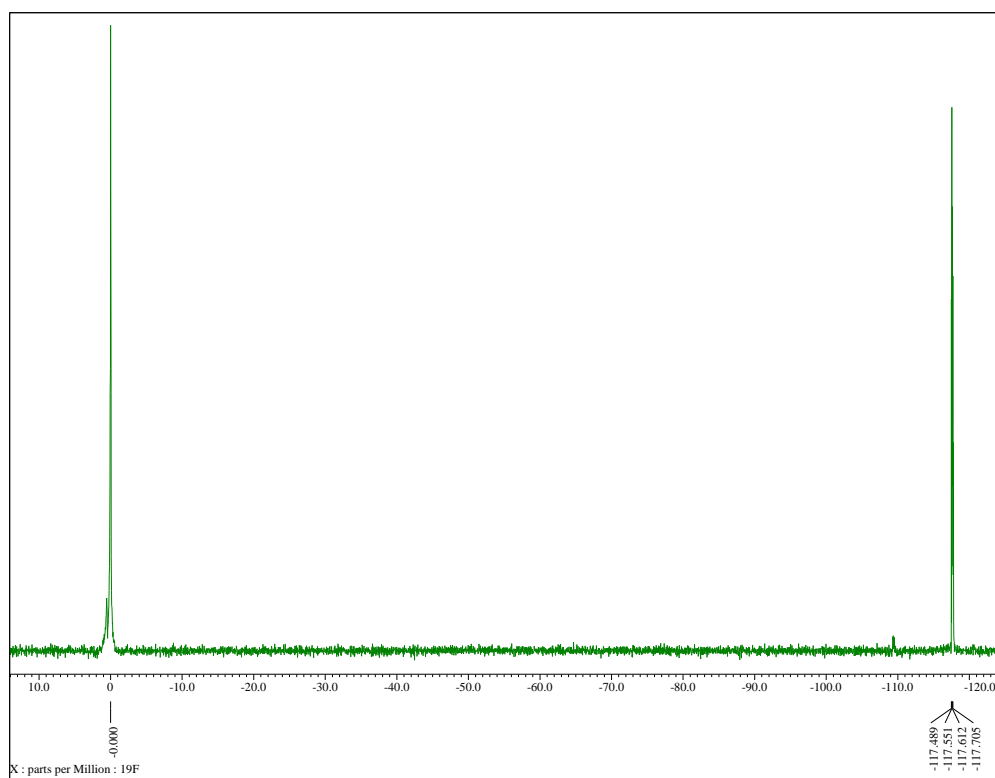

$^1\text{H}$  NOESY spectrum of compound 24

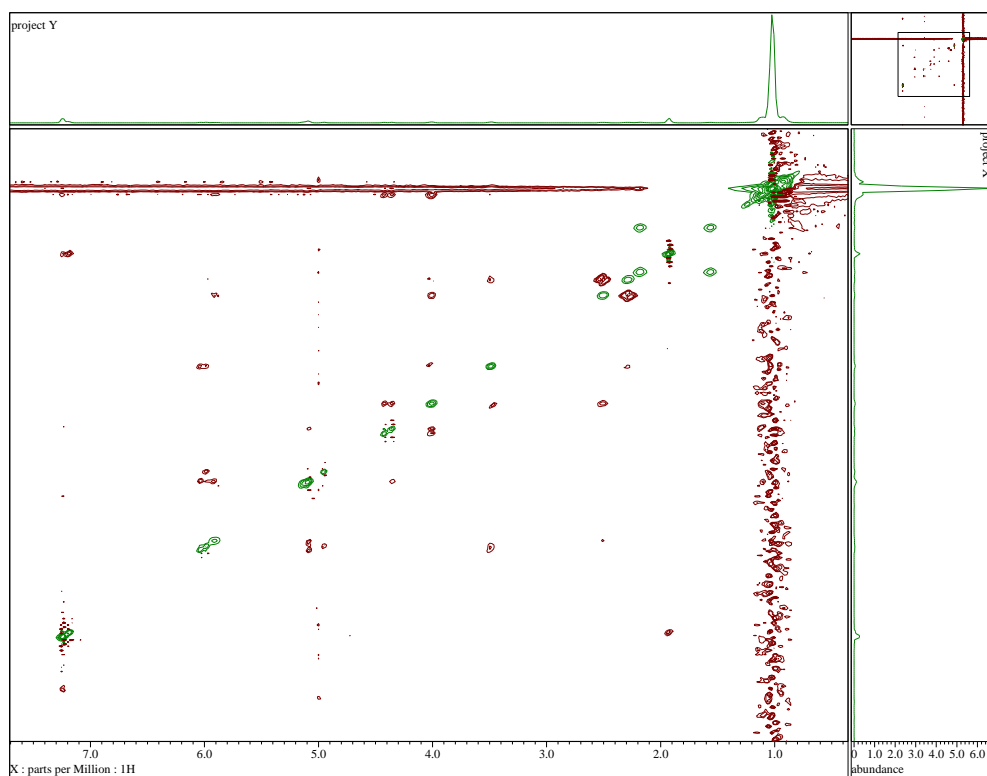

(Enlargement of H-3', H-4' and H-5')

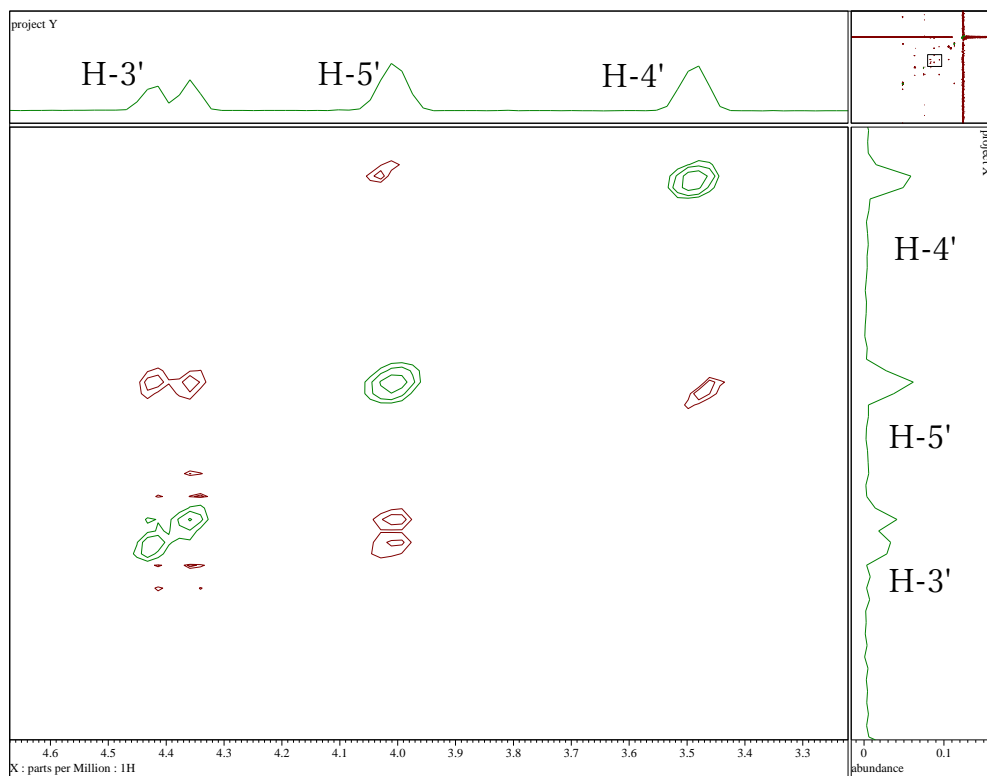

## Reverse-phase HPLC spectra and MALDI-TOF/MS spectra

### Reverse-phase HPLC spectra of DNA 1

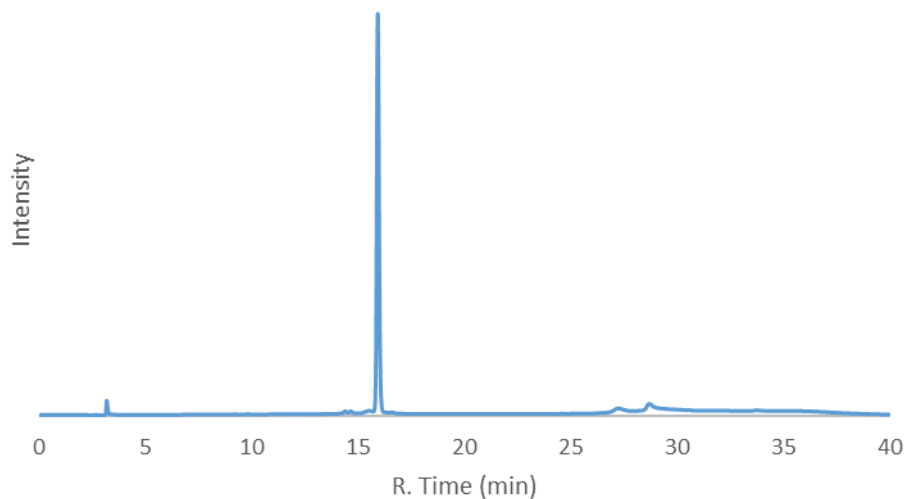

### MALDI-TOF/MS spectra of DNA 1

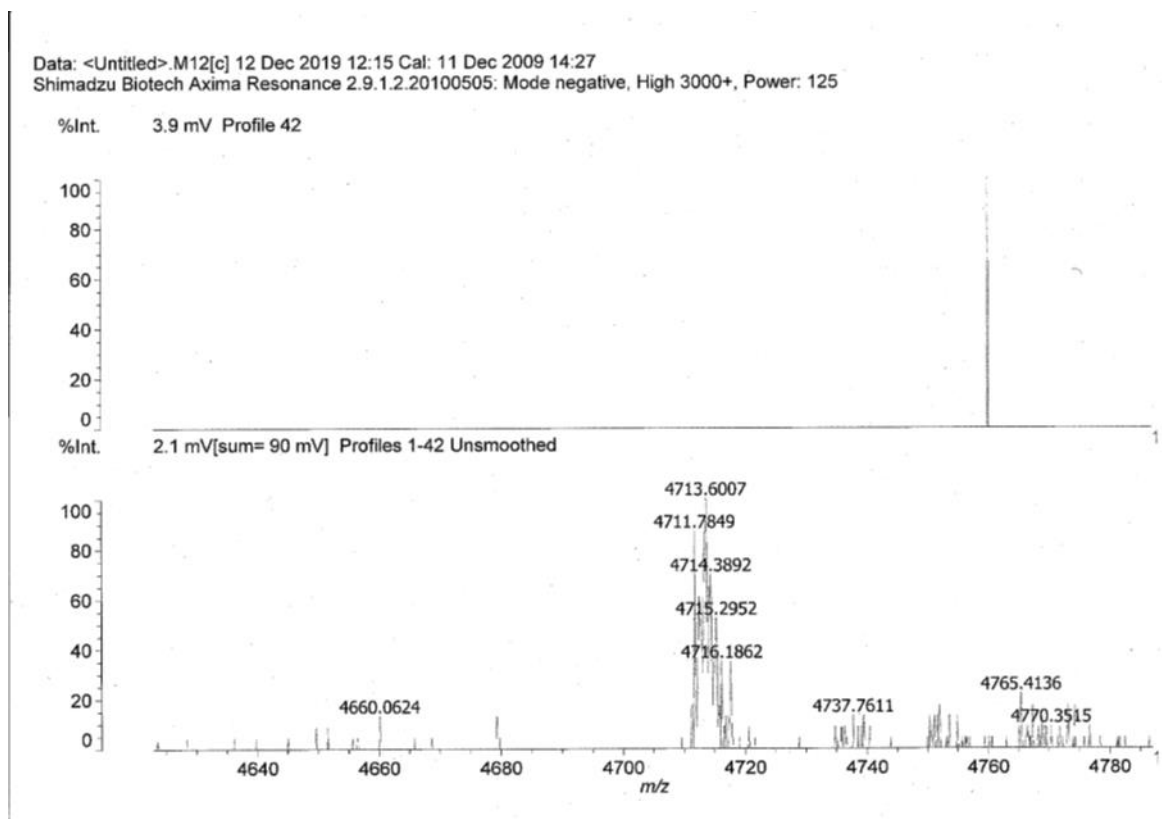

## Reverse-phase HPLC spectra of DNA 2

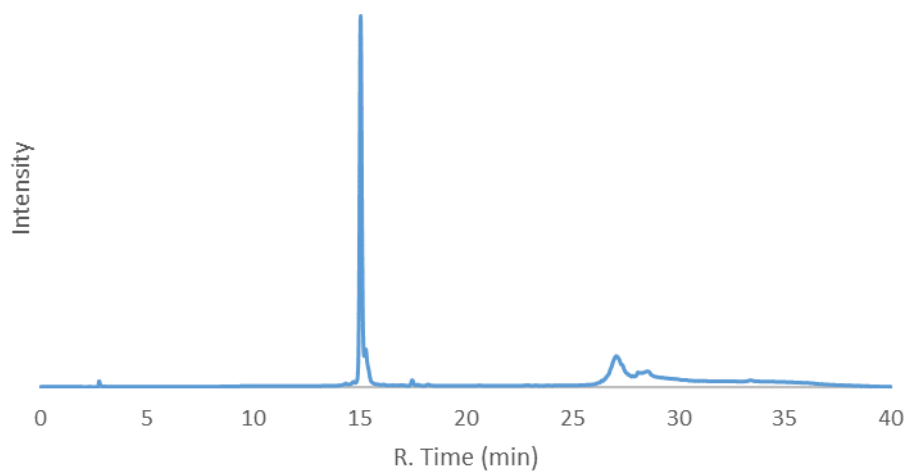

## MALDI-TOF/MS spectra of DNA 2

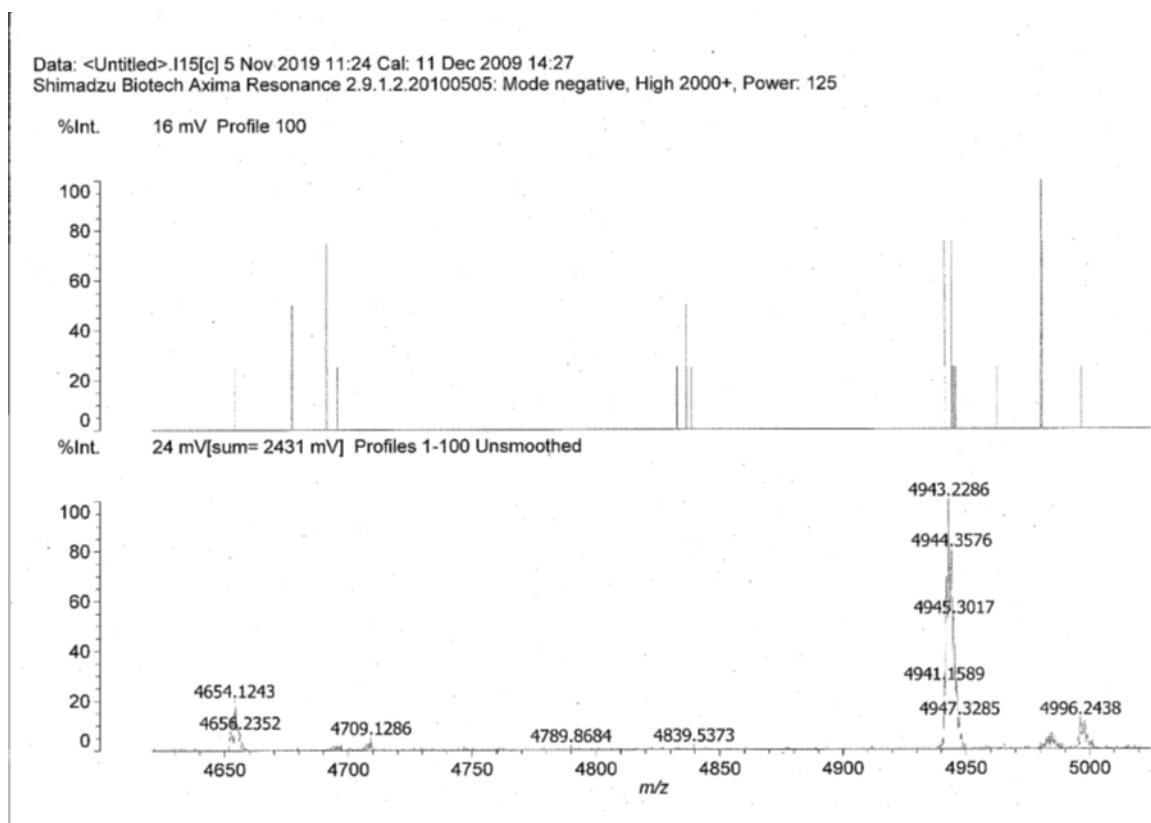

### Reverse-phase HPLC spectra of DNA 3

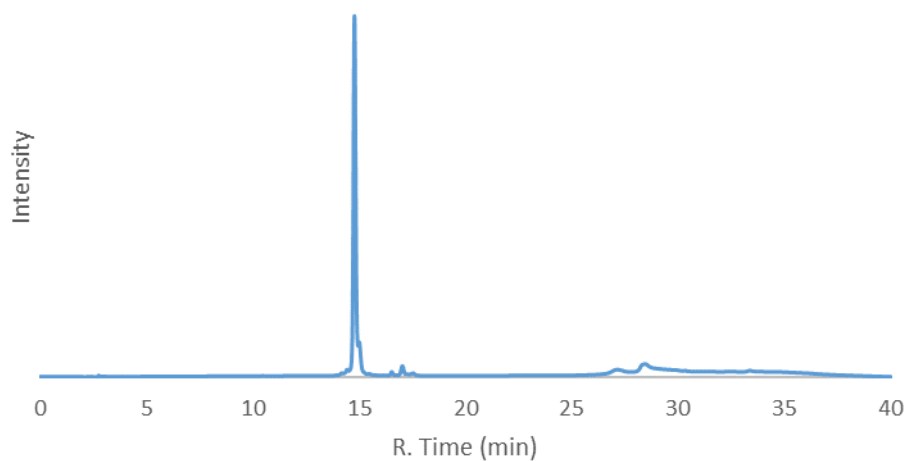

### MALDI-TOF/MS spectra of DNA 3

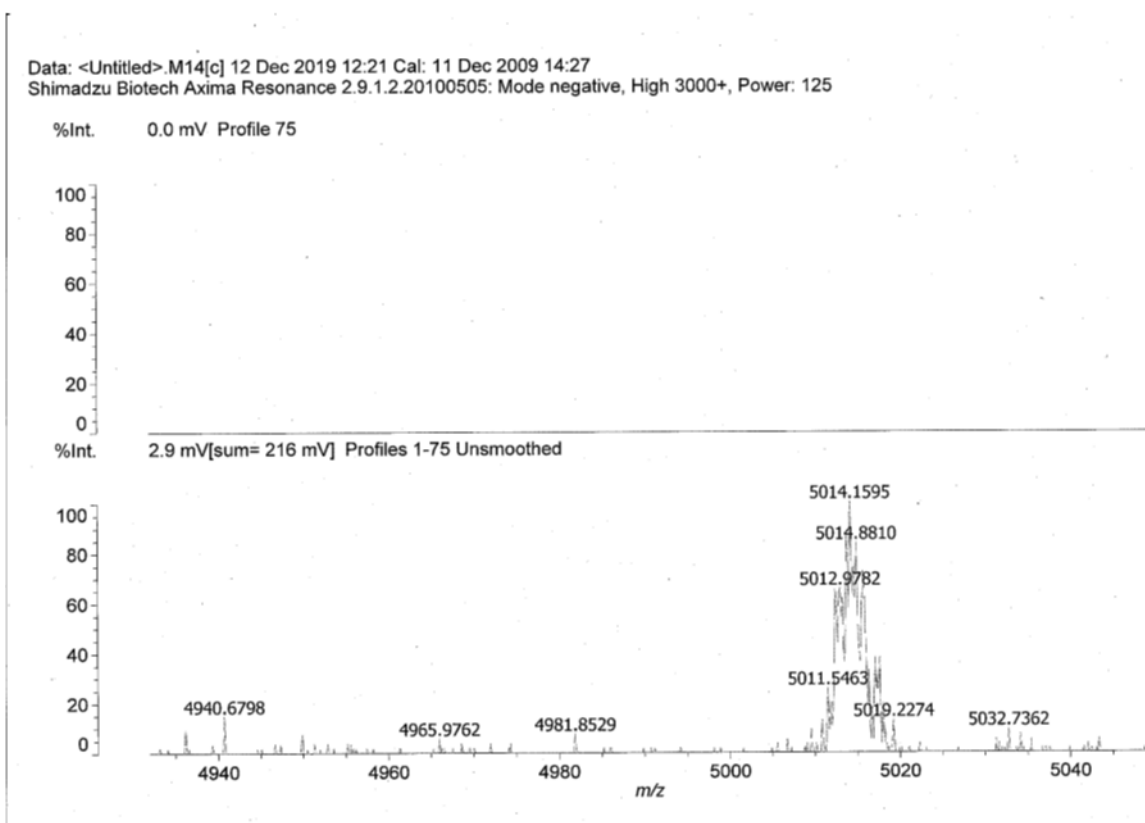

## Reverse-phase HPLC spectra of DNA 5

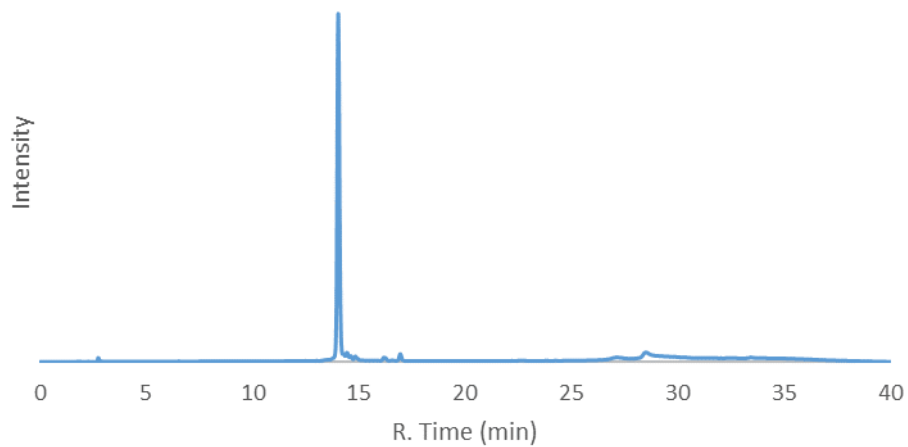

## MALDI-TOF/MS spectra of DNA 5

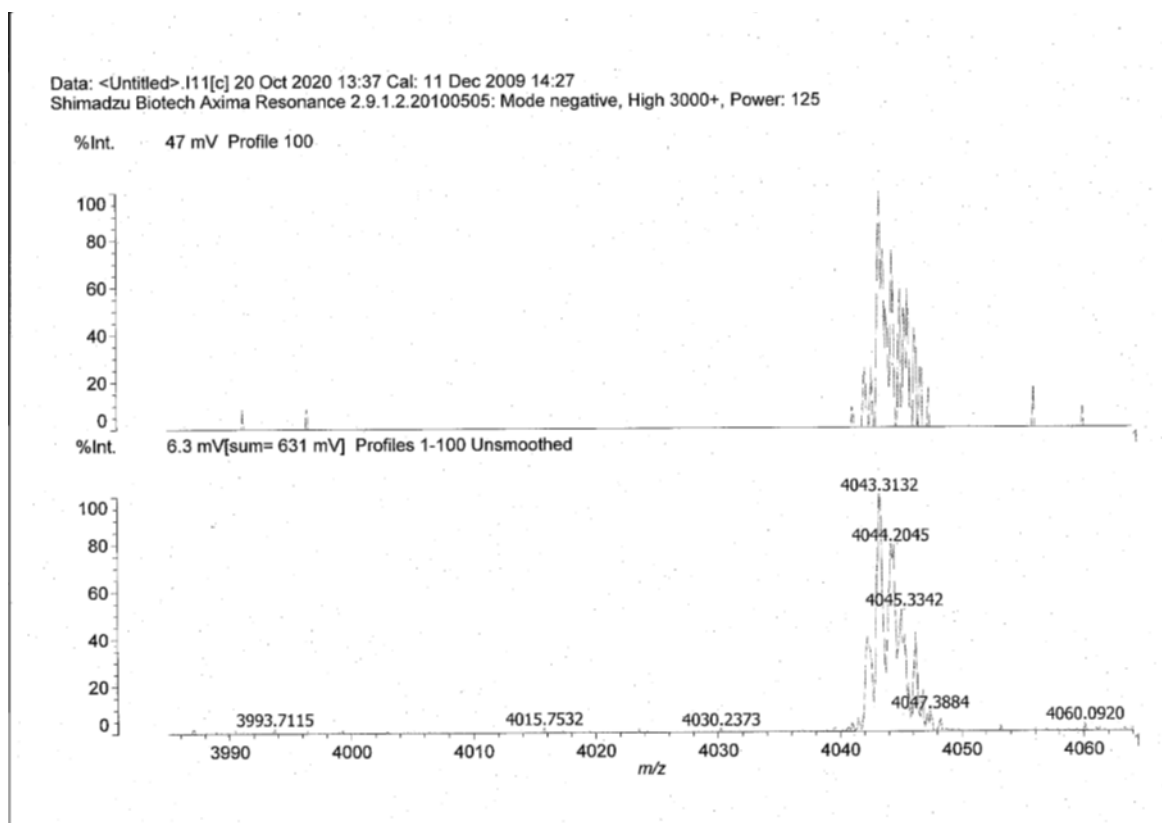



## Reverse-phase HPLC spectra of DNA 6

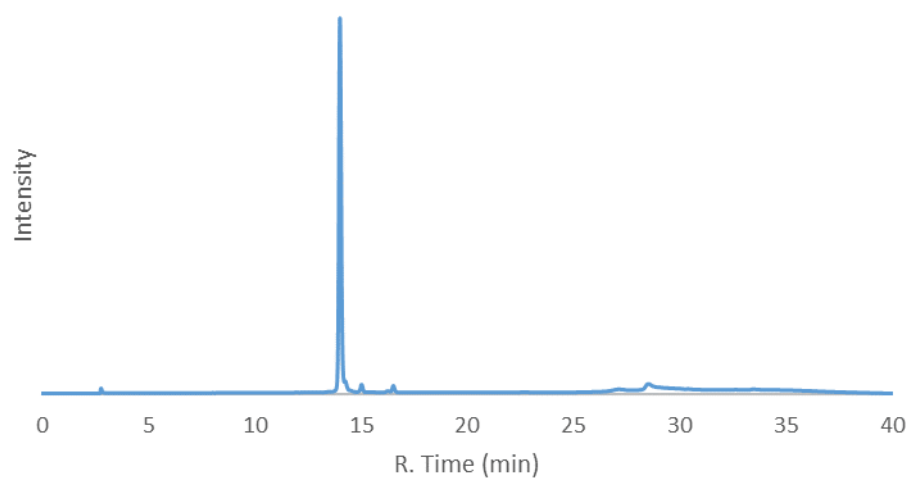

## MALDI-TOF/MS spectra of DNA 6

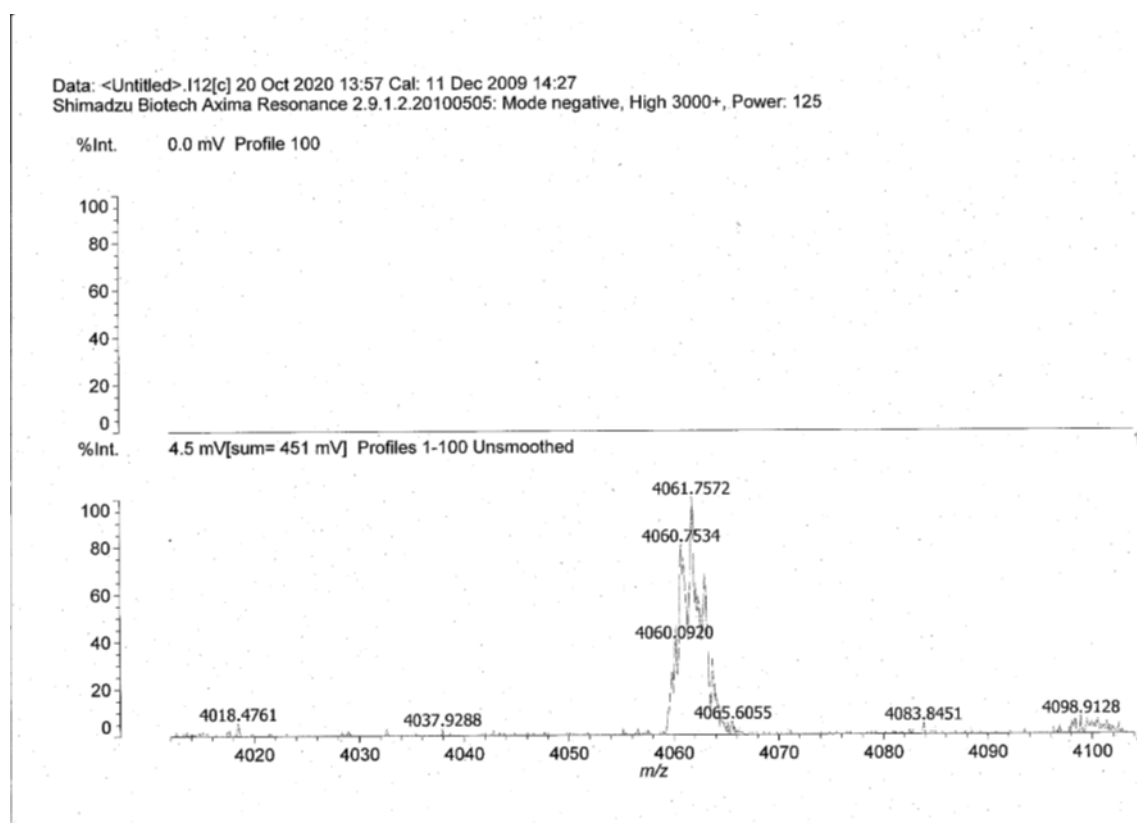

## Reverse-phase HPLC spectra of DNA 7

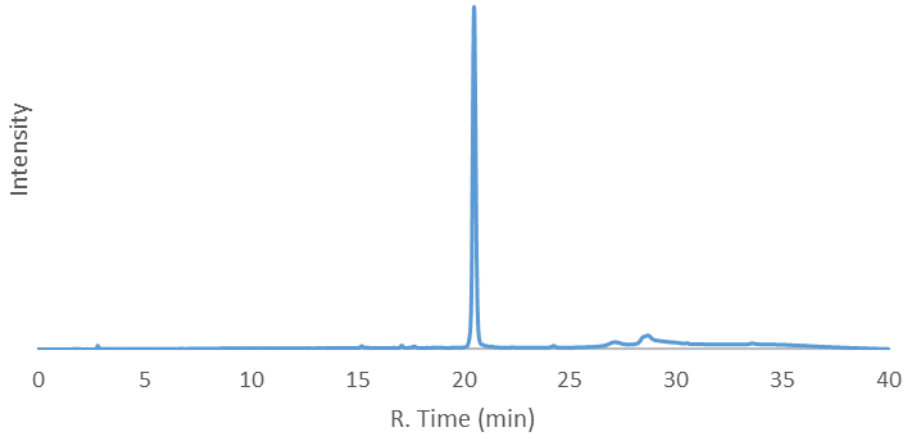

## MALDI-TOF/MS spectra of DNA 7

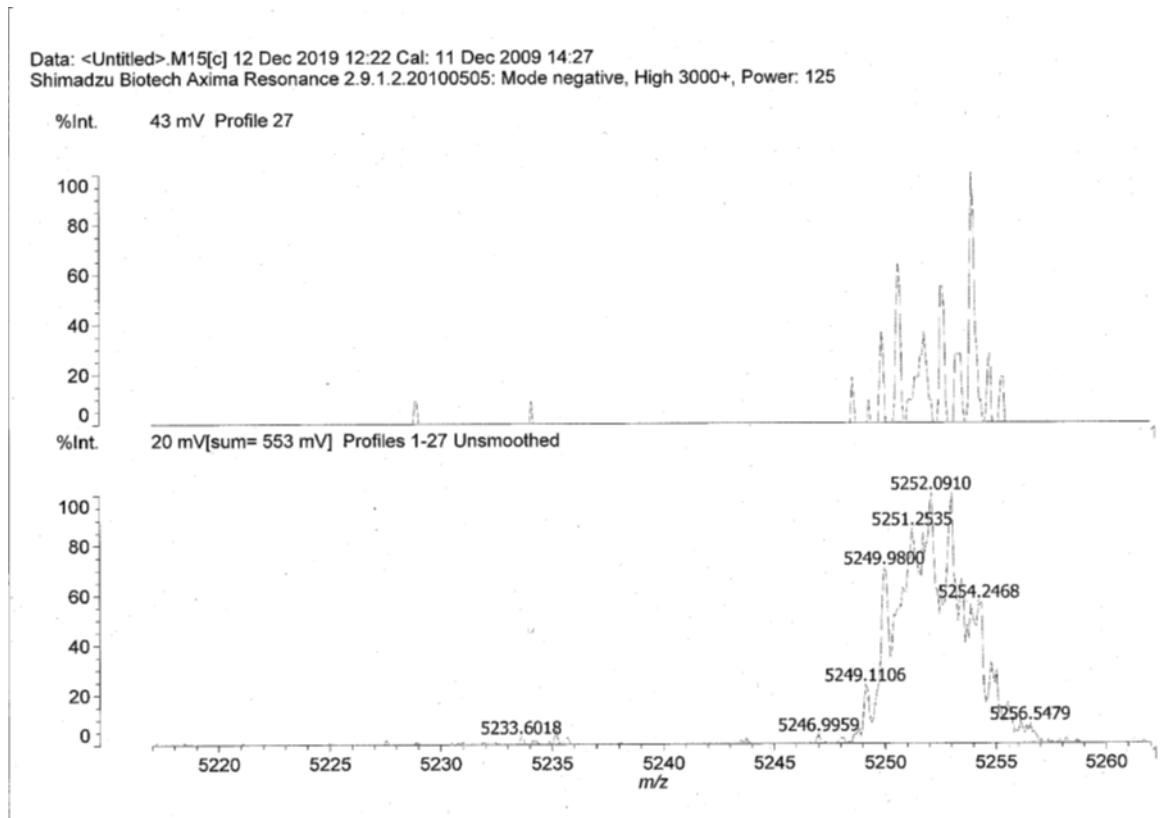

## Reverse-phase HPLC spectra of DNA 8

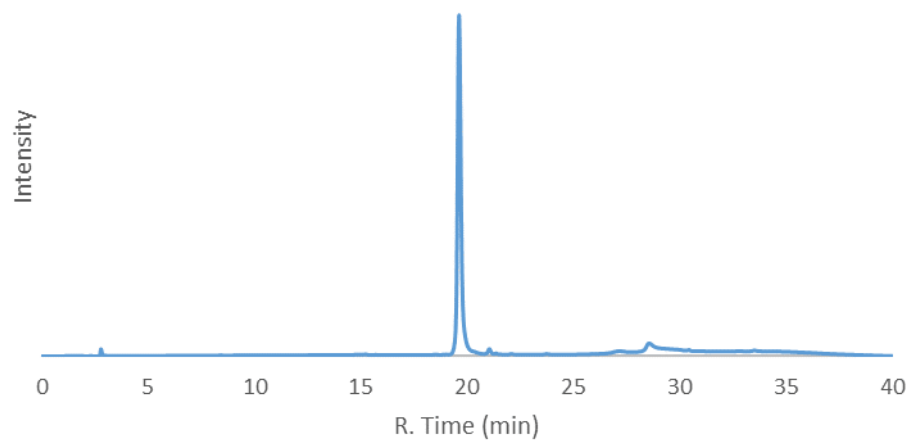

## MALDI-TOF/MS spectra of DNA 8

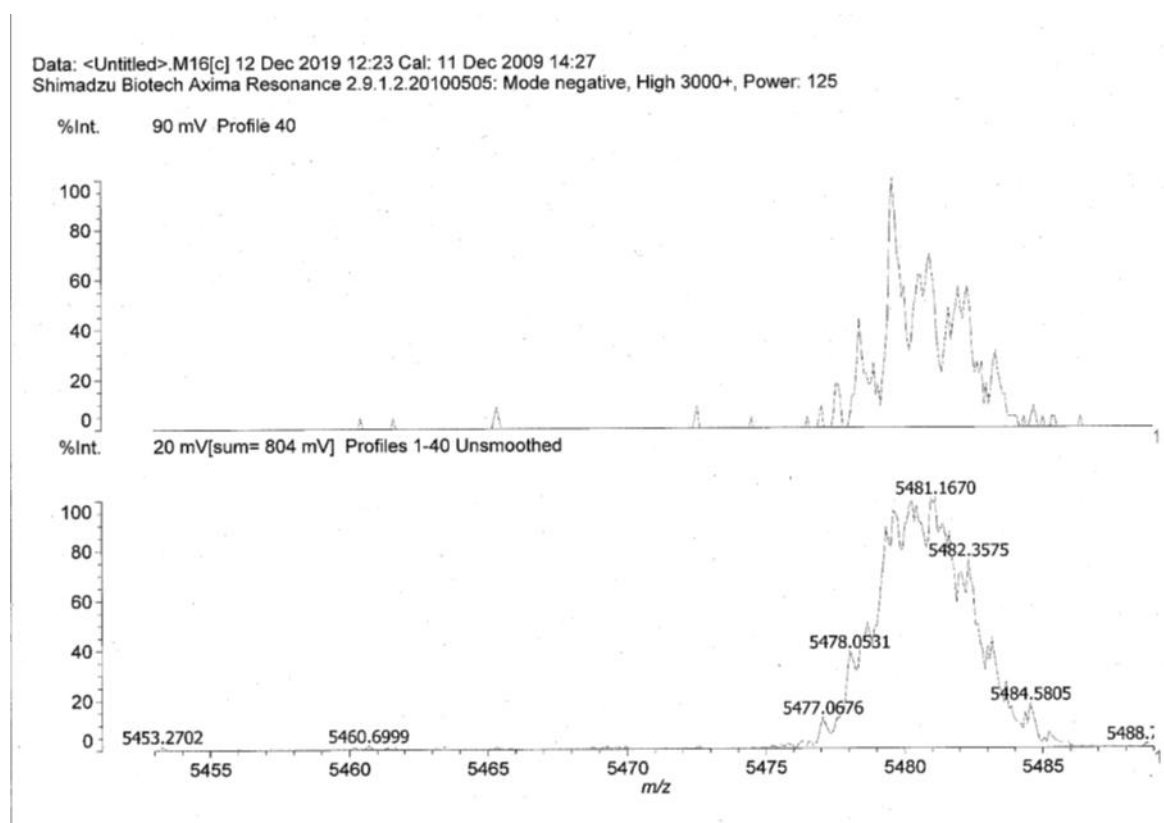

## Reverse-phase HPLC spectra of DNA 9

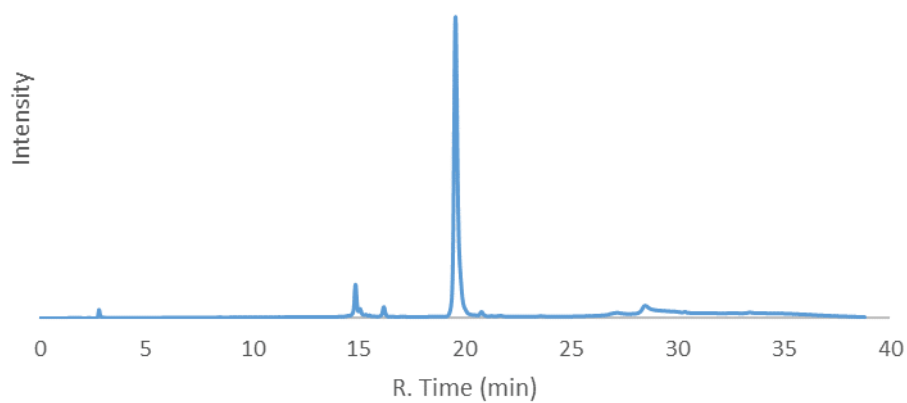

## MALDI-TOF/MS spectra of DNA 9

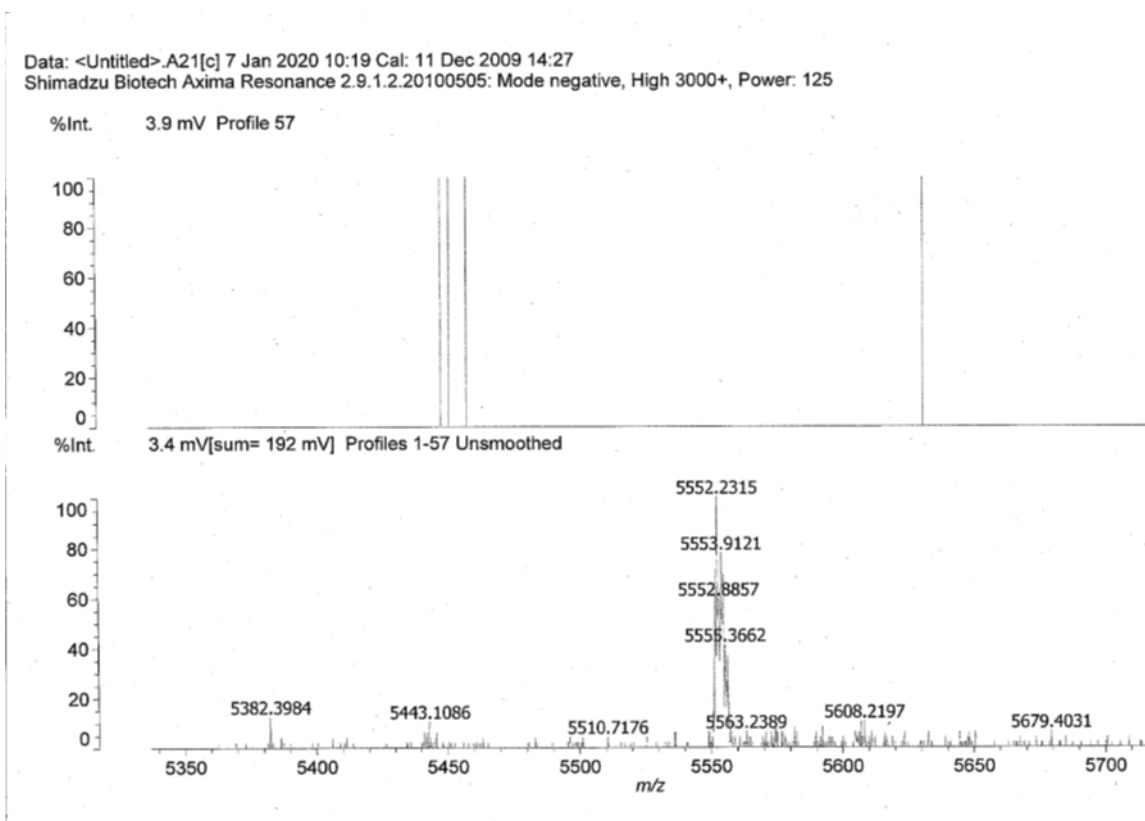

## Reverse-phase HPLC spectra of DNA 10

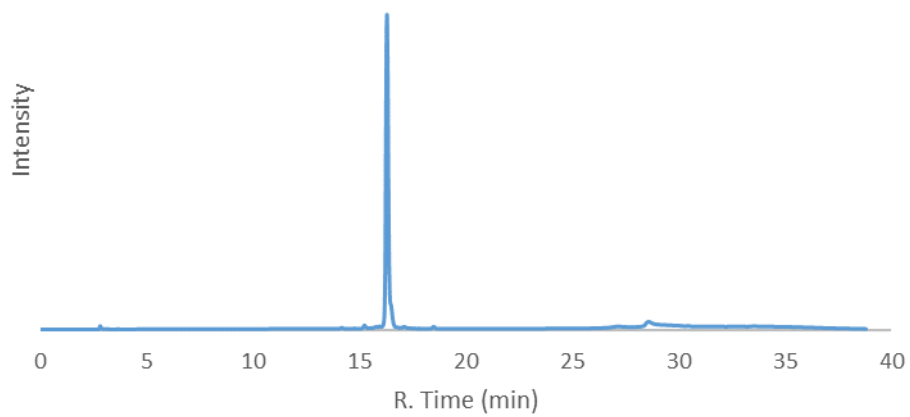

## MALDI-TOF/MS spectra of DNA 10

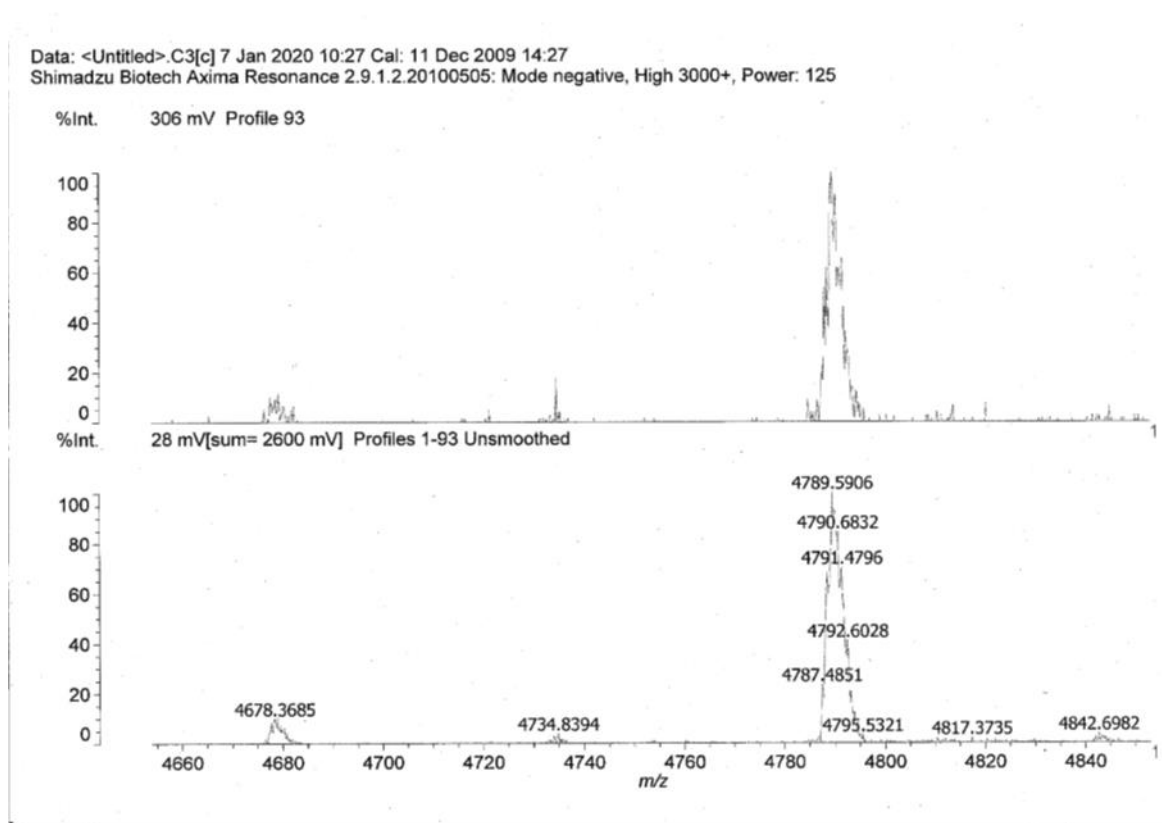

## Reverse-phase HPLC spectra of DNA **11**

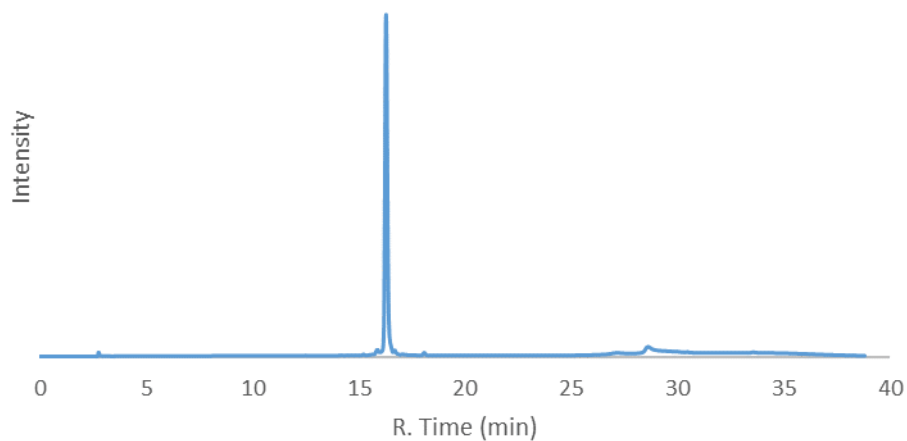

## MALDI-TOF/MS spectra of DNA **11**

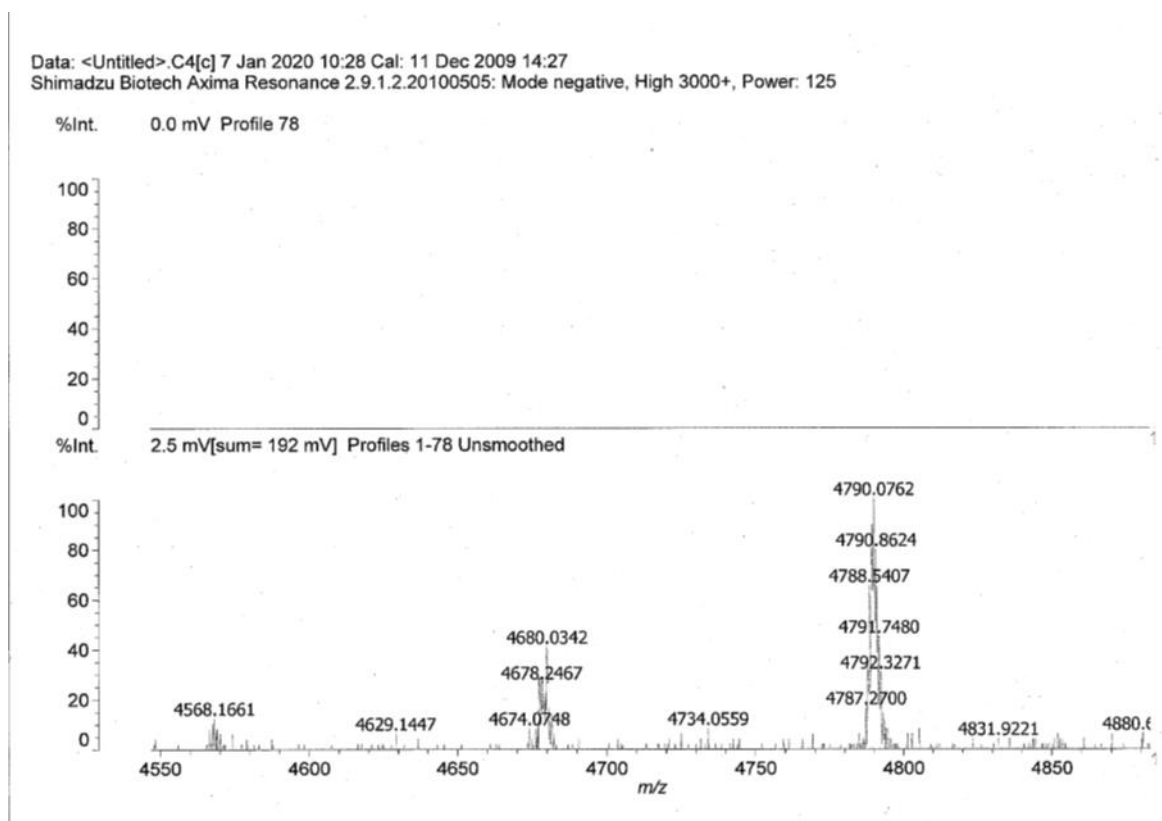

## Reverse-phase HPLC spectra of DNA 12

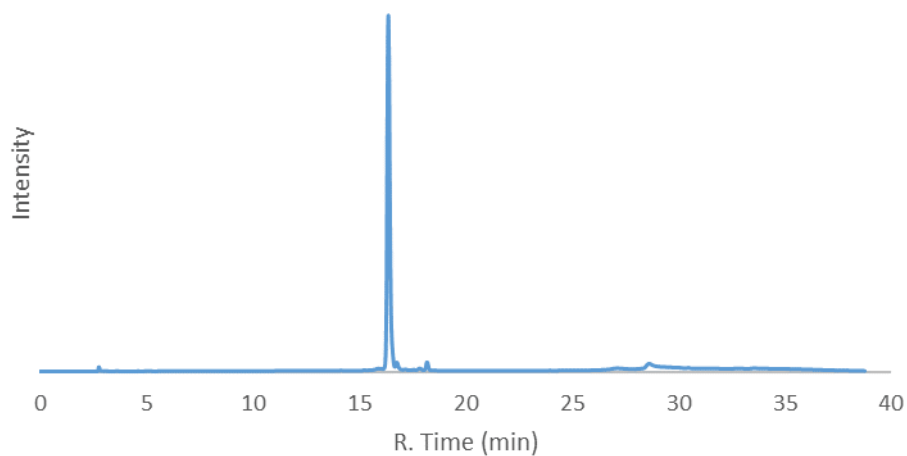

## MALDI-TOF/MS spectra of DNA 12

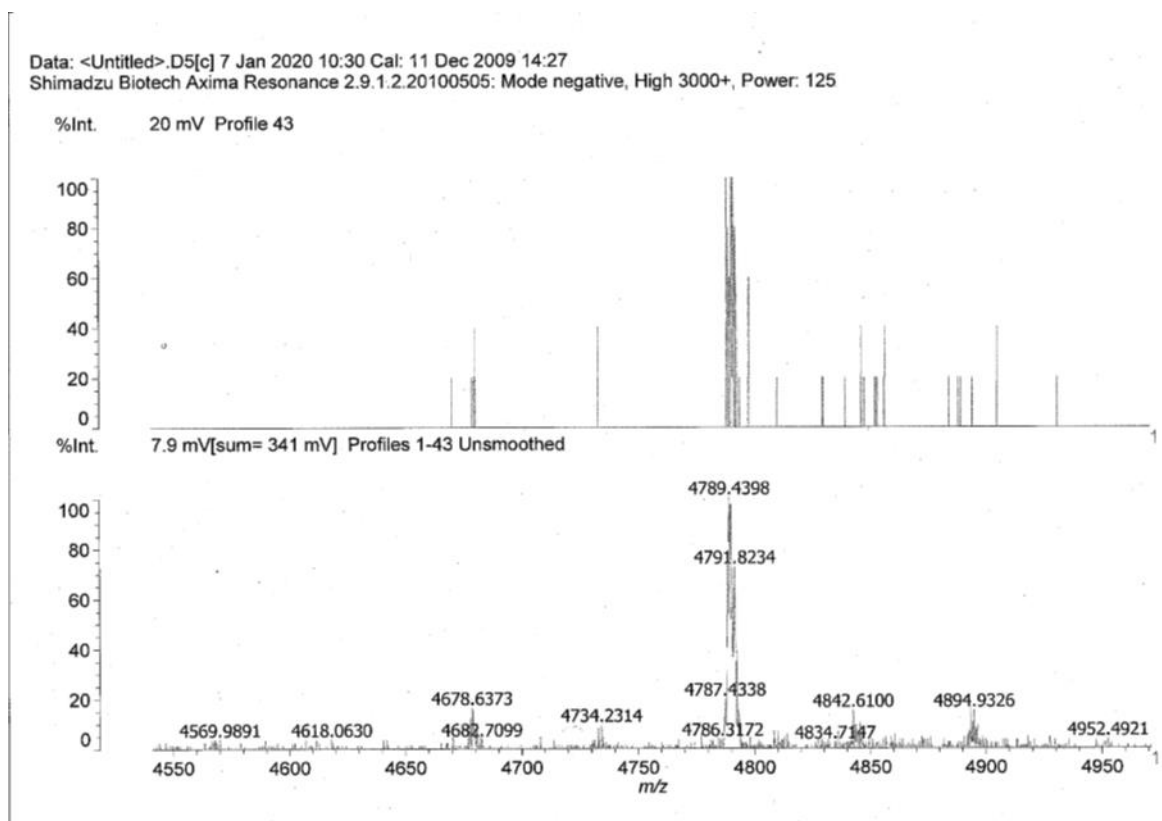

### Reverse-phase HPLC spectra of DNA 13

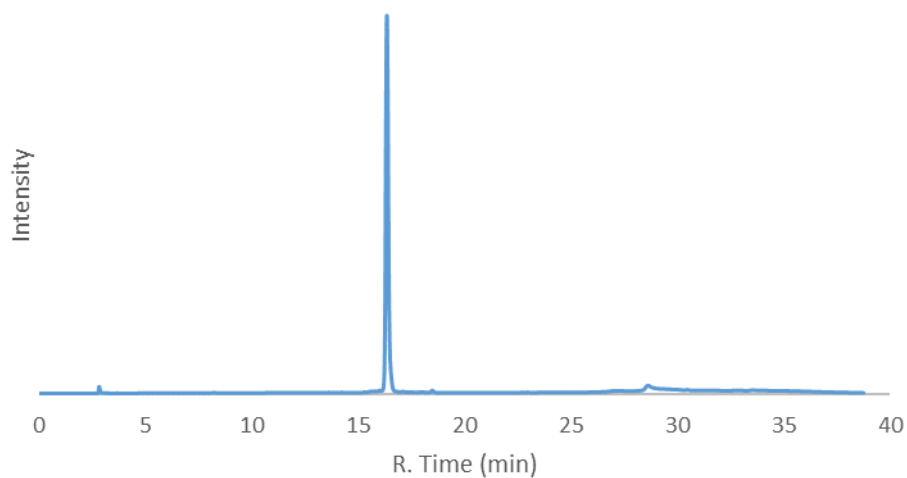

### MALDI-TOF/MS spectra of DNA 13

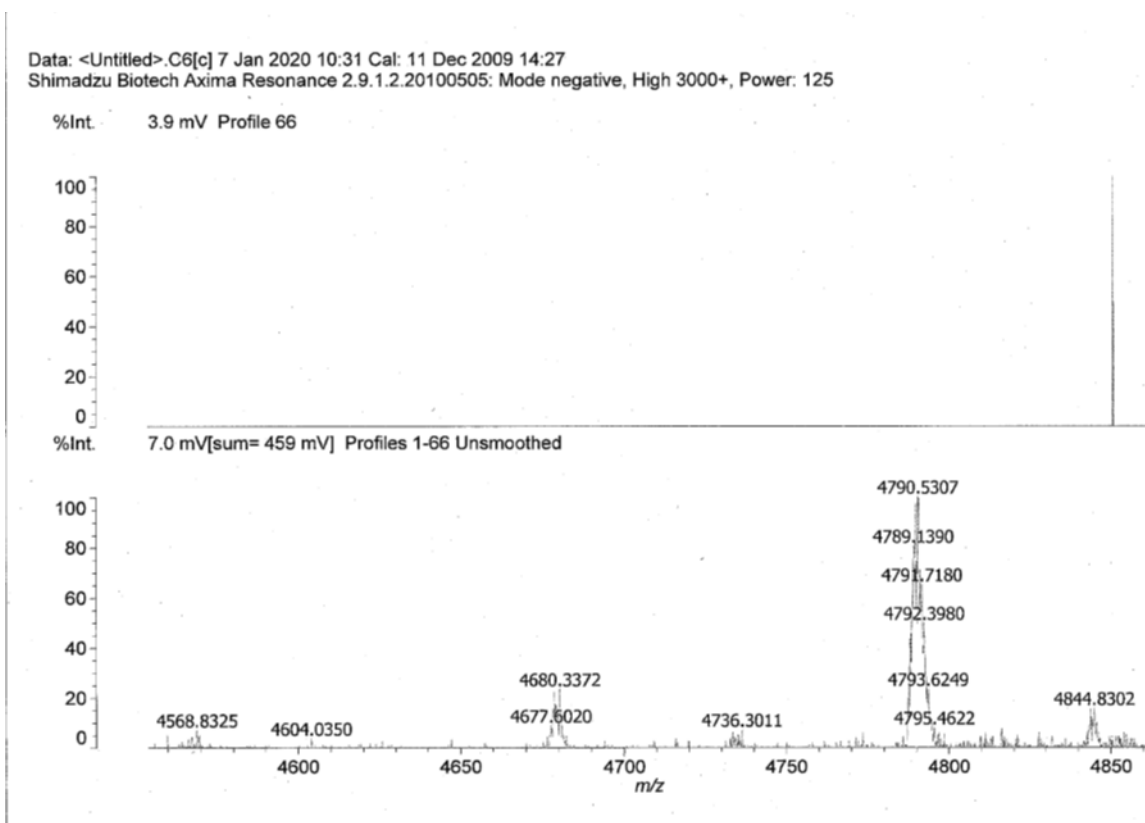



## Reverse-phase HPLC spectra of RNA 1

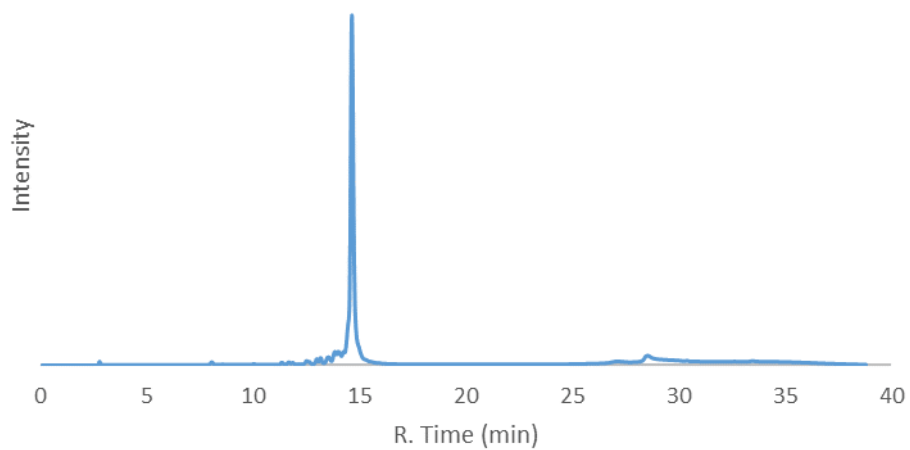

## MALDI-TOF/MS spectra of RNA 1

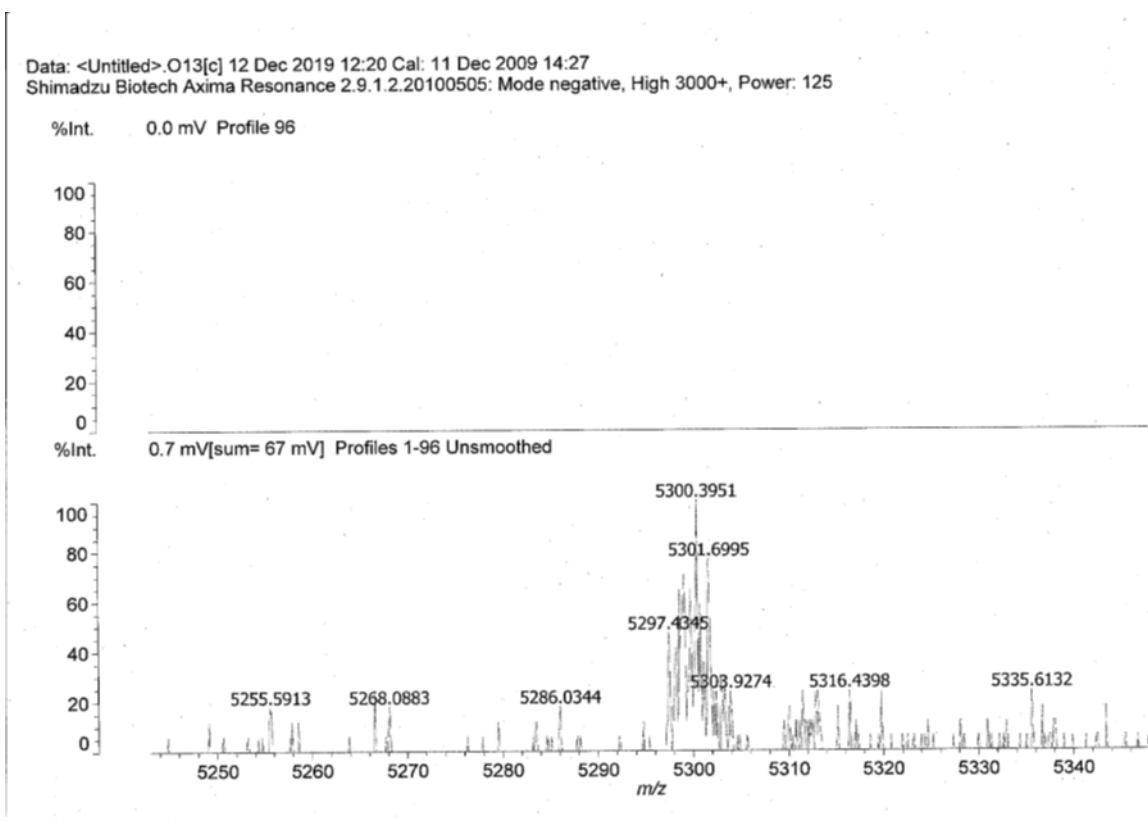

## Reverse-phase HPLC spectra of RNA 6

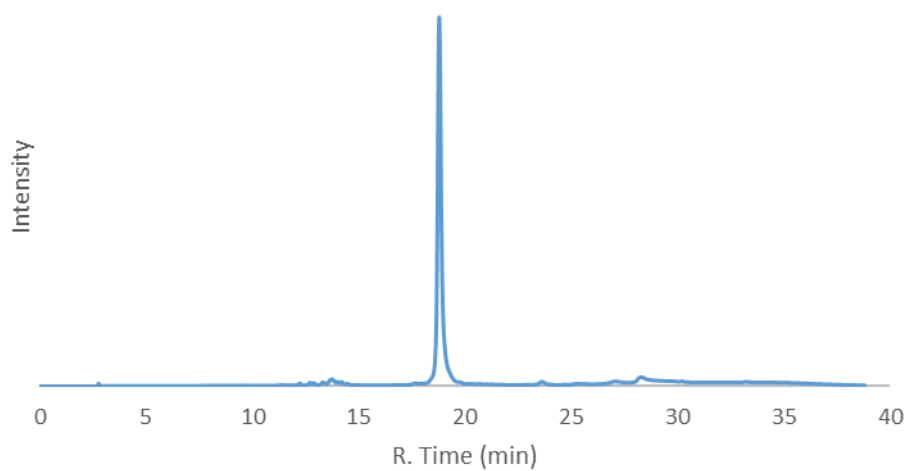

## MALDI-TOF/MS spectra of RNA 6

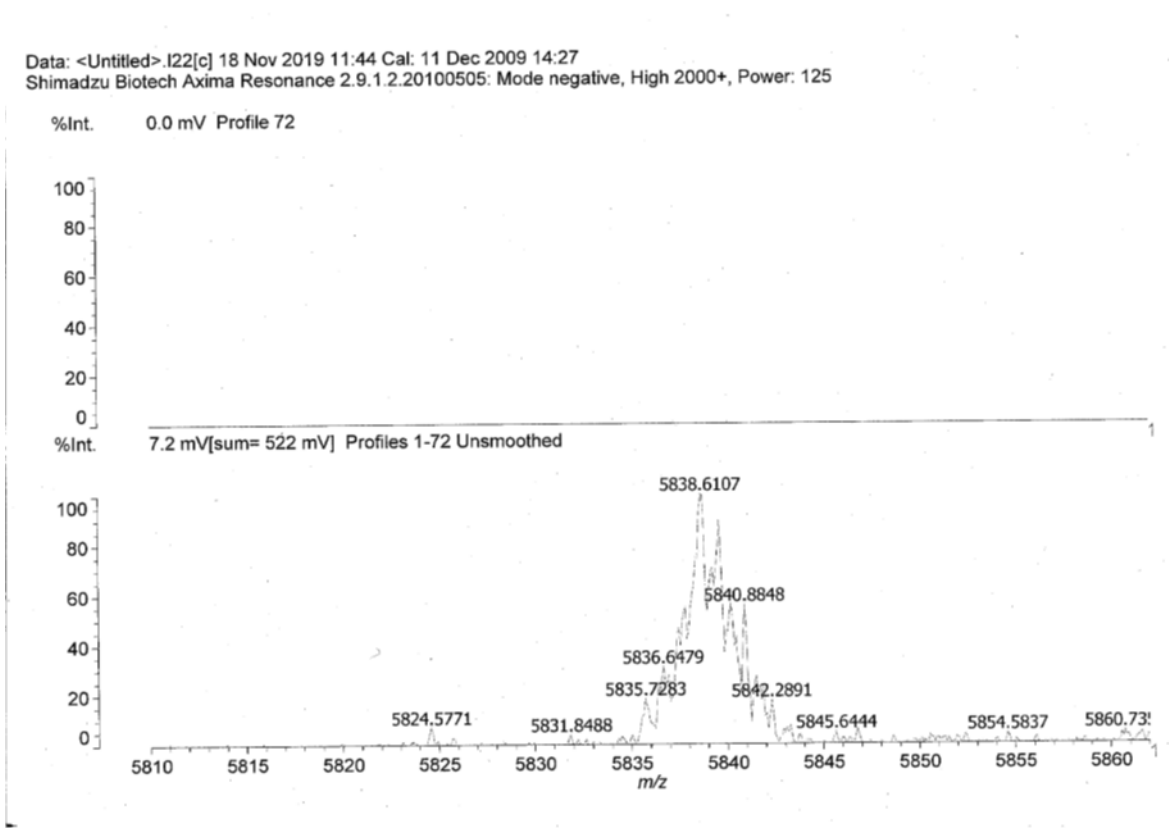

Supplement: d0ra08468a1.pdf [file d0ra08468a1.pdf]
